# Supplementary material for: Trends in proton pump inhibitor use, reflux esophagitis, and various upper gastrointestinal symptoms from 2010 to 2019 in Japan
Source: PLoS One. 2022 Jun 17;17(6):e0270252. doi: 10.1371/journal.pone.0270252 (PMC9205527; doi:10.1371/journal.pone.0270252)
Supplement: S1 Data — (XLSX) [file pone.0270252.s001.xlsx]

## Sheet: Raw Data
YEAR	Age	Gender	Getting heartburn	Stomach getting bloated	Stomach feeling heavy	Rubbing the chest with hands	Feeling sick after meals	Getting heartburn after meals	Unusual sensation in the throat	Feeling full while eating the meals	Some thing getting stuck in swallowing	Bitter liquid coming up to the throat	Burping a lot	Getting heartburn while bending over	Total 12 upper GI symptom scores	Sleeping hours	use of PPI (1: use, 0: no-use)	use of H2RA (1: use, 0: no-use)
2010	50	M	2	2	2	2	1	2	2	1	0	1	2	2	19	6	0	0
2010	41	M	0	0	0	0	0	0	0	0	0	0	0	0	0	7	0	0
2010	59	M	0	0	0	0	0	0	0	0	0	0	0	0	0	6	0	0
2010	53	F	0	1	0	0	0	0	0	0	0	0	0	0	1	6	0	0
2010	50	M	0	0	1	0	0	1	2	0	0	2	1	0	7	5	0	0
2010	34	M	1	0	3	0	0	1	0	0	0	0	0	0	5	5	0	0
2010	55	F	1	0	0	0	0	1	2	0	0	0	0	0	4	6	0	0
2010	61	M	1	0	1	1	0	1	0	0	0	0	0	0	4	6	0	0
2010	57	M	1	1	1	0	0	0	1	1	0	0	0	0	5	7	0	0
2010	62	M	0	0	0	0	0	0	0	0	0	0	0	0	0	7	0	0
2010	40	M	0	1	2	0	0	0	2	1	0	1	3	0	10	5	0	0
2010	54	F	0	0	0	0	0	0	0	0	0	0	0	0	0	7	0	0
2010	53	M	0	1	0	0	0	0	2	0	0	0	0	0	3	4	0	0
2010	44	F	0	0	0	0	0	0	0	0	0	0	0	0	0	6	0	0
2010	45	M	1	0	0	0	0	1	0	0	0	0	2	0	4	6	0	0
2010	34	F	0	0	0	0	0	0	0	0	0	0	0	0	0	6	0	0
2010	58	M	0	0	0	0	0	0	0	0	0	0	0	0	0	7	0	0
2010	62	M	0	0	0	0	0	0	0	0	0	0	0	0	0	8	0	0
2010	59	F	1	2	2	0	0	1	0	1	0	0	0	0	7	7	0	0
2010	60	F	0	0	0	0	0	0	0	0	0	0	0	0	0	6	0	0
2010	34	F	2	2	1	0	1	1	0	2	1	0	2	0	12	5	0	0
2010	37	M	0	0	0	0	0	0	0	0	0	1	1	0	2	6	0	0
2010	33	M	0	0	1	0	0	0	1	0	0	1	1	0	4	5	0	0
2010	59	F	0	1	0	1	0	0	3	2	1	0	0	0	8	6	0	0
2010	70	F	0	1	1	0	0	0	1	0	0	1	0	0	4	6	0	0
2010	35	F	0	0	0	0	0	0	0	0	0	0	0	0	0	7	0	0
2010	60	M	0	1	0	0	0	0	0	0	0	0	0	0	1	7	0	0
2010	38	M	0	0	2	0	0	0	0	0	0	0	0	0	2	5	0	0
2010	28	F	1	1	0	0	0	0	0	1	0	0	0	0	3	7	0	0
2010	59	M	0	0	1	0	0	0	0	0	0	1	0	0	2	8	0	0
2010	40	F	0	4	1	0	1	1	3	0	2	1	0	0	13	6	0	0
2010	46	M	2	0	3	0	0	2	0	1	1	2	1	1	13	6	0	0
2010	50	F	0	1	1	0	1	1	1	1	1	1	1	1	10	6	0	0
2010	57	F	1	0	1	0	0	1	0	0	0	0	0	0	3	6	0	0
2010	49	F	0	0	1	0	0	0	0	1	0	0	0	0	2	8	0	0
2010	52	M	1	3	1	0	1	0	0	0	2	1	0	0	9	7	0	0
2010	54	M	1	0	0	0	0	2	1	0	1	2	0	2	9	6	0	0
2010	57	F	0	1	0	0	0	0	0	0	0	0	0	0	1	6	0	0
2010	59	F	1	1	1	1	0	0	0	0	0	0	1	1	6	7	0	0
2010	58	M	0	0	0	0	0	0	0	0	0	0	0	0	0	6	0	0
2010	57	F	2	0	2	2	1	1	0	1	0	1	0	0	10	6	0	0
2010	48	F	2	3	1	2	1	1	2	1	2	0	1	0	16	5	0	0
2010	47	F	1	0	0	0	0	1	0	0	0	0	0	0	2	5	0	0
2010	57	M	0	0	2	1	0	0	0	1	0	0	0	0	4	5	0	0
2010	49	F	1	2	3	0	1	1	0	2	0	1	2	1	14	6	0	0
2010	60	F	0	1	0	0	0	0	0	0	0	0	0	0	1	6	0	0
2010	65	M	0	1	0	0	0	0	0	0	0	0	0	0	1	7	0	0
2010	52	M	0	2	1	0	0	1	0	0	0	1	2	0	7	5	0	0
2010	49	F	1	2	3	0	0	1	1	1	0	0	1	0	10	6	0	0
2010	48	F	0	0	0	0	0	0	0	0	0	0	0	0	0	5	0	0
2010	45	F	0	1	0	0	0	0	0	0	0	0	0	0	1	6	0	0
2010	45	F	0	1	1	0	0	1	0	0	0	1	4	0	8	7	0	0
2010	56	M	0	0	0	0	0	0	0	0	0	0	0	0	0	7	0	0
2010	53	F	0	0	0	0	0	0	0	0	0	1	3	1	5	8	0	0
2010	54	M	0	0	0	0	0	0	0	0	0	0	0	0	0	7	0	0
2010	42	M	1	0	1	0	0	0	0	0	0	0	0	0	2	6	0	0
2010	40	F	0	0	0	0	0	0	0	0	0	0	0	0	0	8	0	0
2010	41	F	0	0	0	0	0	0	0	0	0	0	0	0	0	7	0	0
2010	44	F	0	3	0	0	0	0	0	0	0	0	0	0	3	7	0	0
2010	46	M	4	4	4	2	3	3	0	0	0	2	2	0	24	6	0	0
2010	52	M	1	1	0	0	0	1	0	0	0	0	0	0	3	5	0	0
2010	47	M	0	0	0	0	0	0	0	0	0	0	0	0	0	7	0	0
2010	44	F	0	0	2	0	0	0	0	0	1	1	0	0	4	6	0	0
2010	45	F	0	4	1	0	1	1	1	0	2	1	4	0	15	6	0	0
2010	53	M	0	0	0	0	0	0	0	0	0	0	0	0	0	6	0	0
2010	66	M	3	2	2	1	0	2	0	0	0	1	2	1	14	6	0	0
2010	56	F	1	2	1	0	0	0	0	0	0	1	1	0	6	6	0	0
2010	74	M	1	0	1	0	0	1	0	1	2	0	0	0	6	6	0	0
2010	50	F	2	3	2	0	1	1	0	0	0	1	2	0	12	5	0	0
2010	57	M	0	0	0	0	0	0	0	0	0	0	0	0	0	6	0	0
2010	35	F	2	3	3	3	3	3	0	2	0	0	0	1	20	7	0	0
2010	48	M	0	1	1	0	0	0	3	0	1	0	2	0	8	5	0	0
2010	48	M	1	1	0	0	0	0	0	0	1	1	2	1	7	7	0	0
2010	36	M	0	0	0	0	0	0	0	0	0	0	0	0	0	6	0	0
2010	47	M	0	0	0	0	0	0	0	0	0	0	0	0	0	6	0	0
2010	47	F	2	0	1	1	1	1	0	0	0	0	0	2	8	6	0	0
2010	62	F	0	0	0	0	0	0	0	0	0	0	0	0	0	6	0	0
2010	38	M	2	0	0	0	0	0	0	0	0	0	0	0	2	6	0	0
2010	56	M	0	2	2	0	0	0	0	0	2	0	2	0	8	5	0	0
2010	59	F	0	0	0	0	0	0	0	0	0	0	0	0	0	6	0	0
2010	49	M	1	0	1	0	1	1	1	0	0	1	1	0	7	6	0	0
2010	45	M	2	0	1	0	0	2	1	0	1	2	1	0	10	6	0	0
2010	55	M	1	0	1	0	0	0	0	0	0	1	0	0	3	8	0	0
2010	53	F	2	2	2	1	1	2	0	2	0	0	1	0	13	6	0	0
2010	37	M	0	0	2	0	0	0	0	0	0	0	0	0	2	8	0	0
2010	50	F	1	1	1	1	1	1	0	0	0	0	0	0	6	6	0	1
2010	50	F	1	0	0	0	0	1	0	0	0	0	0	0	2	7	0	0
2010	33	M	0	0	0	0	0	0	0	0	0	0	0	0	0	5	0	0
2010	38	M	1	0	0	0	0	0	1	1	0	0	0	1	4	7	0	0
2010	27	M	2	1	1	0	0	1	0	0	0	1	1	0	7	5	0	0
2010	40	M	0	2	0	0	0	0	0	0	0	0	0	0	2	6	0	0
2010	34	F	0	0	1	0	0	0	0	0	0	0	0	0	1	7	0	0
2010	36	M	1	0	1	0	0	0	0	0	0	0	0	0	2	4	0	0
2010	53	M	2	1	2	0	0	2	0	0	0	1	2	1	11	6	0	0
2010	35	M	0	0	1	0	0	0	0	0	3	0	0	0	4	6	0	0
2010	48	M	1	0	1	1	0	1	0	0	0	1	1	0	6	7	0	0
2010	43	M	1	2	1	0	0	0	2	0	0	0	0	0	6	6	0	0
2010	62	M	0	1	1	0	0	0	1	1	0	1	1	0	6	6	0	0
2010	60	M	1	2	1	1	0	1	2	0	2	2	2	1	15	5	0	0
2010	51	M	1	1	1	0	0	1	1	0	1	1	0	0	7	7	0	0
2010	69	M	0	0	0	0	0	0	0	0	0	0	0	0	0	5	0	0
2010	57	F	0	1	0	0	0	0	0	0	0	0	0	0	1	7	0	0
2010	55	F	1	0	0	0	0	0	0	0	0	0	0	1	2	6	0	0
2010	48	M	1	1	1	0	0	1	0	0	0	1	0	0	5	5	0	0
2010	49	M	0	0	1	0	0	2	1	0	0	1	1	0	6	7	0	0
2010	60	F	0	0	0	0	0	0	0	0	0	0	0	0	0	6	0	0
2010	49	F	0	2	0	0	0	0	0	1	0	0	1	0	4	7	0	0
2010	57	F	0	0	0	0	0	0	0	0	0	0	2	0	2	7	0	0
2010	42	F	0	1	1	0	0	0	0	0	0	0	0	0	2	6	0	0
2010	52	M	1	0	0	0	0	1	1	0	0	0	1	1	5	7	0	0
2010	53	M	0	3	1	0	1	0	0	0	0	0	1	0	6	7	0	0
2010	56	M	0	0	0	0	0	0	1	0	0	0	2	0	3	8	0	0
2010	60	F	0	0	0	0	0	0	0	0	0	0	0	0	0	5	0	0
2010	40	F	1	0	1	0	0	1	0	1	0	0	0	0	4	6	0	0
2010	61	F	0	0	0	0	1	0	0	1	0	0	0	0	2	7	0	0
2010	37	M	1	0	0	0	0	0	0	0	0	0	0	0	1	6	0	0
2010	51	M	0	0	1	0	0	1	0	0	0	0	0	0	2	5	0	0
2010	37	M	0	0	0	0	0	0	0	0	0	0	0	0	0	7	0	0
2010	39	M	0	0	0	0	0	0	0	0	0	0	0	0	0	6	0	0
2010	43	F	0	0	0	0	0	0	0	1	0	0	0	0	1	6	0	0
2010	49	F	0	2	1	1	0	1	2	0	0	1	0	1	9	6	0	0
2010	36	M	0	0	0	0	0	0	0	0	0	4	2	0	6	7	0	0
2010	44	M	3	1	2	2	1	2	3	1	0	2	2	1	20	6	0	0
2010	51	M	1	0	0	0	0	0	0	0	0	0	0	0	1	8	0	0
2010	41	M	0	0	0	0	0	0	1	0	1	1	1	0	4	6	0	0
2010	61	M	1	3	1	0	0	1	1	1	0	0	1	0	9	6	0	0
2010	54	M	0	2	0	1	0	0	1	1	1	0	0	0	6	6	0	0
2010	61	F	3	1	0	0	0	1	0	0	1	3	1	0	10	5	0	0
2010	38	F	0	0	1	0	1	0	0	1	1	0	0	0	4	7	0	0
2010	40	M	0	2	1	0	0	0	1	0	0	0	0	0	4	8	0	0
2010	54	F	0	1	1	0	0	0	1	0	0	0	1	0	4	5	0	0
2010	47	F	2	2	1	0	0	1	1	1	0	1	0	1	10	7	0	0
2010	57	M	0	0	0	0	0	0	0	0	0	0	0	0	0	6	0	0
2010	42	F	0	1	0	0	1	0	2	1	1	0	1	0	7	5	0	0
2010	60	F	0	0	0	0	0	0	0	0	0	0	0	0	0	6	0	0
2010	55	M	0	0	0	0	0	0	2	0	0	0	0	0	2	5	0	0
2010	42	M	1	0	0	0	1	0	0	0	0	0	0	0	2	7	0	0
2010	46	M	1	1	0	0	0	0	0	0	0	1	0	0	3	5	0	0
2010	48	F	2	2	2	2	0	1	0	1	0	0	0	0	10	6	0	0
2010	41	M	0	0	0	0	0	0	0	0	0	0	0	0	0	7	0	0
2010	48	M	0	2	1	0	1	0	1	0	1	1	1	0	8	6	0	0
2010	57	M	0	0	1	0	0	0	0	0	0	1	0	0	2	5	0	0
2010	68	M	1	0	0	0	0	0	0	0	0	0	0	0	1	7	0	0
2010	41	M	0	0	0	0	0	0	1	0	0	1	1	0	3	6	0	0
2010	40	M	0	0	0	0	0	0	0	0	0	1	0	0	1	6	0	0
2010	39	M	1	1	1	0	0	0	0	0	0	0	0	0	3	6	0	0
2010	52	F	0	0	0	0	0	1	0	0	0	0	0	0	1	6	0	0
2010	58	F	1	1	1	1	1	1	1	1	0	0	0	1	9	6	0	0
2010	58	M	0	0	0	0	0	0	0	0	0	0	0	0	0	6	0	0
2010	57	M	0	0	0	0	0	0	0	0	0	0	1	0	1	7	0	0
2010	37	M	2	2	2	0	1	2	1	1	1	0	1	0	13	6	0	0
2010	54	M	0	0	0	0	0	0	0	0	0	0	0	0	0	7	0	0
2010	61	F	1	1	1	1	1	1	1	0	0	1	1	1	10	4	0	0
2010	55	F	0	0	0	0	0	0	0	0	0	0	0	0	0	6	0	0
2010	43	M	1	1	1	0	0	1	0	0	0	3	2	1	10	8	0	0
2010	60	F	0	0	0	0	0	0	0	0	0	0	0	0	0	8	0	0
2010	62	M	1	2	0	0	0	0	0	0	0	0	1	0	4	8	0	1
2010	41	F	2	2	2	0	2	2	2	2	2	0	0	0	16	5	0	0
2010	36	F	0	3	1	0	0	0	0	0	0	0	0	0	4	7	0	0
2010	55	F	0	1	0	0	0	0	0	0	0	0	0	0	1	6	0	0
2010	54	F	0	1	0	0	0	0	0	1	0	0	0	0	2	6	0	0
2010	53	M	0	1	0	0	1	1	2	1	1	1	2	0	10	6	0	0
2010	52	F	0	0	0	0	0	0	0	0	0	0	0	0	0	5	0	0
2010	49	F	0	0	0	0	0	0	0	0	0	0	0	0	0	8	0	0
2010	51	M	0	0	0	0	0	0	0	0	0	1	0	0	1	7	0	0
2010	49	F	2	3	2	1	2	1	2	1	1	2	2	1	20	8	0	0
2010	61	F	0	0	0	0	0	0	1	0	0	1	0	0	2	8	0	0
2010	41	M	0	0	0	0	0	0	0	0	0	0	3	0	3	7	0	0
2010	38	M	0	1	0	0	0	0	1	2	0	0	0	0	4	5	0	0
2010	55	F	0	2	0	0	0	0	0	0	0	0	0	0	2	7	0	0
2010	58	M	1	3	2	1	0	1	0	2	0	0	1	0	11	6	0	0
2010	48	M	1	2	2	0	0	1	2	1	1	1	1	0	12	6	0	0
2010	56	M	1	1	0	0	0	0	1	0	0	0	1	1	5	6	0	0
2010	42	M	1	2	0	0	0	0	0	1	0	0	0	0	4	6	0	0
2010	35	F	0	0	0	0	0	0	0	0	0	2	0	0	2	7	0	0
2010	67	M	0	0	0	0	0	0	0	0	0	0	0	0	0	10	0	0
2010	39	F	0	1	1	1	1	0	0	0	0	0	0	0	4	8	0	0
2010	56	M	1	1	1	1	0	1	0	1	0	1	1	0	8	6	0	0
2010	68	M	0	0	0	0	0	0	0	0	0	1	0	0	1	8	0	0
2010	56	F	0	0	0	0	0	0	0	0	0	0	0	0	0	6	0	0
2010	59	F	2	0	0	0	0	2	0	0	0	0	0	0	4	6	0	0
2010	57	M	0	1	1	0	0	0	3	0	0	1	1	1	8	6	0	0
2010	61	M	2	1	0	1	0	0	1	1	0	0	2	0	8	7	0	0
2010	59	F	1	2	1	0	0	1	0	0	0	0	0	0	5	5	0	0
2010	61	M	1	2	2	0	0	1	3	0	0	0	0	0	9	6	0	0
2010	50	M	1	0	1	0	0	1	0	1	0	0	0	0	4	7	0	0
2010	65	M	1	0	0	0	0	0	0	0	0	0	0	0	1	7	0	0
2010	54	M	1	0	0	0	0	0	0	0	0	0	0	0	1	7	0	0
2010	54	M	1	2	2	0	0	0	1	2	0	0	2	0	10	6	0	0
2010	52	M	1	1	1	0	0	1	0	0	0	1	0	0	5	6	0	0
2010	57	F	0	2	1	0	0	0	0	0	0	0	0	0	3	5	0	0
2010	56	F	0	0	0	0	1	0	0	0	0	0	0	0	1	5	0	0
2010	53	F	1	1	1	0	0	1	1	0	0	0	0	0	5	5	0	0
2010	52	F	0	0	0	0	0	0	0	0	0	0	0	0	0	5	0	0
2010	56	F	0	0	2	1	1	0	1	1	1	0	0	0	7	6	0	0
2010	41	M	0	2	1	1	1	1	0	0	0	0	0	0	6	4	0	0
2010	43	M	1	3	1	0	0	1	0	0	0	1	0	0	7	5	0	0
2010	48	M	1	1	2	1	1	1	0	0	0	0	1	0	8	6	0	0
2010	59	M	0	0	0	0	0	0	0	0	0	0	0	0	0	7	0	0
2010	44	M	1	1	0	0	0	1	0	0	0	0	1	0	4	6	0	0
2010	42	M	0	0	0	0	0	0	0	0	0	0	0	0	0	7	0	0
2010	42	F	0	0	0	0	0	0	0	0	0	0	0	0	0	6	0	0
2010	60	M	0	0	0	0	0	0	0	0	0	0	0	0	0	7	0	0
2010	39	M	0	2	0	0	0	0	2	0	0	0	0	0	4	5	0	0
2010	47	F	0	0	0	0	0	0	0	0	1	0	0	0	1	5	0	0
2010	39	F	0	0	0	0	0	0	0	0	0	0	0	0	0	7	0	0
2010	39	F	0	2	3	0	0	0	0	2	0	0	0	0	7	7	0	0
2010	55	F	1	1	0	0	0	1	1	1	1	1	1	1	9	5	0	0
2010	52	M	0	0	1	0	0	0	4	0	0	1	0	0	6	6	0	0
2010	46	M	1	1	1	0	0	1	0	0	1	0	1	0	6	5	0	0
2010	55	F	0	0	0	0	0	0	0	0	0	0	0	0	0	8	0	0
2010	41	M	0	0	0	0	0	0	0	0	0	0	0	0	0	6	0	0
2010	46	M	1	1	2	1	0	1	2	1	0	0	1	0	10	8	0	0
2010	46	M	0	0	0	0	0	0	0	0	0	0	0	0	0	7	0	0
2010	56	M	2	0	0	0	0	0	2	0	0	0	0	0	4	8	0	0
2010	43	M	1	1	0	0	0	0	1	0	0	0	0	0	3	6	0	0
2010	40	F	0	1	0	0	0	0	0	1	2	0	0	0	4	6	0	0
2010	56	M	1	2	2	0	1	1	1	0	0	0	0	0	8	8	0	1
2010	51	F	0	0	0	0	0	0	0	1	0	0	0	0	1	5	0	0
2010	50	F	1	1	0	0	0	1	0	0	0	0	0	0	3	7	0	0
2010	52	F	0	0	0	2	0	0	0	0	0	0	0	0	2	6	0	0
2010	41	M	0	1	0	0	0	0	0	1	0	0	0	0	2	5	0	0
2010	62	M	0	0	0	0	0	0	0	0	0	0	0	0	0	6	0	0
2010	47	F	0	0	0	0	0	0	0	0	1	0	1	1	3	6	0	0
2010	60	M	0	0	0	0	0	0	0	0	0	0	0	0	0	7	0	0
2010	25	M	0	0	0	1	0	0	0	0	2	1	0	0	4	6	0	0
2010	43	M	0	0	0	0	0	0	0	0	0	1	1	0	2	6	0	0
2010	41	M	0	0	0	0	0	0	0	0	0	0	0	0	0	5	0	0
2010	56	M	0	0	0	1	0	0	0	0	0	0	0	0	1	6	0	0
2010	48	M	0	1	1	0	0	0	1	0	0	0	0	0	3	6	0	0
2010	46	M	0	0	0	0	0	0	0	0	1	0	0	0	1	5	0	0
2010	45	F	0	1	1	0	1	1	0	0	0	0	0	0	4	5	0	0
2010	62	M	0	0	0	0	0	0	0	0	0	0	0	0	0	8	0	0
2010	57	F	1	0	1	0	0	0	0	0	0	1	0	0	3	7	0	0
2010	57	F	0	0	2	0	0	0	4	0	0	0	0	0	6	7	0	0
2010	52	F	0	2	0	0	0	0	0	0	0	0	0	0	2	5	0	0
2010	54	F	0	0	1	0	0	0	0	0	0	0	0	0	1	6	0	0
2010	57	F	0	0	0	0	0	0	2	2	0	0	0	2	6	7	0	0
2010	53	F	0	2	0	0	0	1	0	0	0	0	0	0	3	6	0	0
2010	54	M	0	1	1	0	0	1	0	0	1	1	4	1	10	7	0	0
2010	59	M	2	0	2	0	0	0	0	3	0	0	0	0	7	8	0	1
2010	53	F	0	2	0	1	0	0	0	0	0	0	0	0	3	6	0	0
2010	59	F	1	2	1	1	0	1	0	0	1	0	1	0	8	7	0	0
2010	38	M	3	3	3	0	3	3	0	0	1	3	3	3	25	6	0	0
2010	53	M	1	1	1	0	1	1	0	1	0	1	1	1	9	6	0	0
2010	46	M	0	0	0	0	0	0	0	0	0	0	1	0	1	7	0	0
2010	50	F	0	0	1	0	0	0	1	0	0	0	0	0	2	6	0	0
2010	50	M	1	1	0	0	0	0	0	0	0	0	0	0	2	6	0	0
2010	49	M	0	2	0	0	0	0	0	0	0	0	1	0	3	7	0	0
2010	49	F	0	0	1	0	0	1	0	1	0	0	1	0	4	5	0	0
2010	59	M	0	2	0	0	0	0	0	1	0	0	1	0	4	6	0	0
2010	49	M	0	1	0	0	0	0	0	0	0	0	0	0	1	5	0	0
2010	50	F	0	2	1	0	0	0	0	0	0	0	0	0	3	6	0	0
2010	58	M	1	1	0	0	0	1	0	1	0	0	0	0	4	6	0	0
2010	51	F	1	0	0	0	0	1	0	0	1	0	0	0	3	7	0	0
2010	48	F	0	0	1	0	0	0	2	0	1	0	0	0	4	6	0	0
2010	48	F	1	0	1	0	1	1	0	1	0	0	1	0	6	6	0	0
2010	46	F	0	0	0	0	0	0	0	0	0	0	0	0	0	7	0	0
2010	59	M	2	2	2	0	0	2	0	0	0	2	0	0	10	5	0	0
2010	51	M	1	2	1	1	1	0	1	0	0	0	0	0	7	6	0	1
2010	56	F	0	0	1	0	0	0	0	0	1	0	0	0	2	5	0	0
2010	44	M	2	1	0	0	1	1	0	1	0	1	1	0	8	6	0	0
2010	44	M	0	0	0	0	0	0	0	0	0	0	0	0	0	8	0	0
2010	51	M	0	0	0	0	0	0	0	0	0	0	0	0	0	6	0	0
2010	53	M	0	0	1	0	1	1	2	2	0	1	1	0	9	7	0	0
2010	36	M	0	0	0	0	0	0	0	1	0	0	0	0	1	6	0	0
2010	54	F	2	4	1	1	1	1	3	1	0	0	2	0	16	7	0	0
2010	41	M	0	2	1	0	0	0	1	0	0	1	0	1	6	6	0	0
2010	52	M	0	0	0	0	0	0	0	0	0	1	2	0	3	6	0	0
2010	55	F	0	0	0	0	0	0	0	0	0	0	0	0	0	5	0	0
2010	49	F	0	2	1	0	0	1	0	0	0	1	1	1	7	6	0	0
2010	46	F	1	0	1	0	0	0	1	0	2	1	1	0	7	7	0	0
2010	36	M	0	0	0	0	0	0	0	0	0	0	0	0	0	7	0	0
2010	46	M	0	0	2	0	0	0	1	1	0	1	1	1	7	6	0	0
2010	47	F	0	2	1	0	0	0	0	0	0	0	0	0	3	6	0	0
2010	53	M	1	0	0	0	0	1	0	0	0	0	2	1	5	7	0	0
2010	58	M	0	1	1	0	0	0	1	0	0	1	1	0	5	6	0	0
2010	45	M	0	0	0	0	0	0	0	0	0	0	0	0	0	6	0	0
2010	41	F	0	0	2	0	0	0	0	1	0	0	4	0	7	6	0	0
2010	62	M	0	1	1	0	0	0	0	0	0	0	0	0	2	6	0	0
2010	39	F	0	0	0	0	0	0	0	0	0	0	0	0	0	6	0	0
2010	55	F	0	0	1	0	0	0	0	0	0	0	1	0	2	6	0	0
2010	55	M	1	1	1	0	0	1	0	1	0	1	2	0	8	8	0	0
2010	48	F	0	0	1	0	0	1	0	1	0	0	0	0	3	8	0	0
2010	47	M	0	2	0	0	0	0	1	0	0	0	2	0	5	8	0	0
2010	42	M	0	0	0	0	0	0	0	0	0	0	0	0	0	5	0	0
2010	57	M	1	1	0	0	0	0	0	0	0	0	0	0	2	6	0	0
2010	50	F	0	0	0	0	0	0	0	0	2	1	0	0	3	4	0	0
2010	46	M	0	0	0	0	0	0	0	0	0	0	0	0	0	6	0	0
2010	42	M	0	0	0	0	0	0	0	0	0	0	0	0	0	7	0	0
2010	52	M	0	2	0	0	0	0	0	0	0	0	0	0	2	5	0	0
2010	53	M	3	4	3	0	1	2	0	4	1	3	2	4	27	5	0	0
2010	54	F	0	1	1	0	0	1	0	0	0	0	1	0	4	6	0	0
2010	57	M	0	0	0	0	0	0	0	0	0	0	0	0	0	6	0	0
2010	42	M	3	1	2	0	1	2	0	1	0	0	2	3	15	7	0	0
2010	43	F	2	2	1	0	0	1	1	1	0	0	1	0	9	8	0	0
2010	52	M	0	0	0	0	0	0	0	0	0	0	0	0	0	8	0	0
2010	66	M	1	0	1	0	1	1	0	1	0	1	2	0	8	7	0	0
2010	55	F	2	2	2	0	0	0	0	0	0	1	0	0	7	6	0	0
2010	41	F	2	2	2	2	1	1	4	1	0	0	1	0	16	5	0	0
2010	50	F	0	0	0	0	0	0	1	0	1	0	1	0	3	6	0	0
2010	65	F	2	2	2	2	2	2	2	3	2	2	2	2	25	5	0	0
2010	36	F	1	1	1	1	0	0	0	0	0	1	0	0	5	6	0	1
2010	38	F	0	0	0	0	0	0	0	0	0	0	0	0	0	6	0	0
2010	52	F	0	0	0	0	0	0	0	0	0	0	0	0	0	6	0	0
2010	55	F	2	2	2	1	0	2	0	0	1	2	2	2	16	6	0	0
2010	49	F	1	1	2	1	0	0	0	0	0	0	0	0	5	6	0	0
2010	59	M	0	0	0	0	0	0	0	0	0	0	1	0	1	8	0	0
2010	47	F	1	2	0	0	0	1	1	0	0	0	0	0	5	5	0	0
2010	51	F	0	1	1	0	0	0	0	1	0	0	1	1	5	6	0	0
2010	47	M	0	0	0	0	0	0	0	0	0	0	0	0	0	6	0	0
2010	57	M	2	2	0	1	0	0	3	0	0	1	1	0	10	7	0	0
2010	53	M	0	0	0	0	0	0	0	0	0	0	0	0	0	8	0	0
2010	53	F	0	2	0	0	1	0	0	2	0	0	3	0	8	5	0	0
2010	66	M	0	1	0	0	0	0	0	0	0	1	2	0	4	6	0	0
2010	59	M	0	0	0	0	0	0	2	0	1	0	0	0	3	7	0	0
2010	54	F	0	0	0	0	0	0	0	0	0	0	0	0	0	6	0	0
2010	57	M	0	0	0	0	0	0	0	0	0	0	1	0	1	5	0	0
2010	43	M	0	2	0	0	0	0	2	0	0	0	0	0	4	5	0	0
2010	50	F	0	2	2	0	0	0	0	0	0	0	0	0	4	7	0	0
2010	44	F	1	0	2	0	0	2	1	0	0	1	2	2	11	5	0	0
2010	50	M	0	1	1	0	0	0	0	0	0	0	0	0	2	5	0	0
2010	46	F	0	2	2	0	0	0	3	0	0	0	0	0	7	6	0	0
2010	41	F	2	1	2	0	0	1	0	2	0	0	1	0	9	8	0	0
2010	39	M	2	0	1	0	0	2	0	0	1	0	0	0	6	4	0	0
2010	39	M	0	1	2	0	1	0	0	1	1	1	0	0	7	6	0	0
2010	46	M	0	0	0	0	0	0	0	0	0	0	0	0	0	5	0	0
2010	47	M	0	2	0	0	0	0	0	2	0	0	0	0	4	5	0	0
2010	41	F	3	2	2	1	0	2	0	1	0	0	0	0	11	6	0	0
2010	73	M	0	0	1	0	0	0	3	0	3	0	0	0	7	7	0	0
2010	50	F	0	1	0	0	0	0	0	0	0	0	0	0	1	6	0	0
2010	48	M	3	2	2	0	0	1	0	0	2	1	0	0	11	6	0	0
2010	42	F	1	1	0	0	0	0	0	1	0	0	0	0	3	5	0	0
2010	44	F	1	1	1	0	0	1	0	0	0	1	1	0	6	6	0	0
2010	62	F	0	1	2	2	0	0	3	1	0	0	0	0	9	5	0	0
2010	69	M	0	0	0	0	0	0	2	0	0	0	0	0	2	7	0	0
2010	58	M	0	0	0	0	0	0	0	1	0	0	0	0	1	6	0	0
2010	69	M	0	0	0	0	0	0	0	0	0	0	0	0	0	7	0	0
2010	50	M	2	2	2	0	1	2	2	2	2	2	2	0	19	6	0	1
2010	48	M	1	1	1	0	1	0	1	1	0	1	1	0	8	5	0	0
2010	38	M	0	0	1	0	0	0	0	0	0	0	1	0	2	7	0	0
2010	57	F	0	0	1	0	0	0	0	1	0	0	0	0	2	7	0	0
2010	48	F	0	0	0	0	0	0	0	0	0	0	0	0	0	8	0	0
2010	49	F	0	2	2	0	0	0	1	0	0	0	0	0	5	7	0	0
2010	43	F	1	1	1	0	0	1	1	1	0	0	0	0	6	7	0	0
2010	65	F	1	0	0	0	0	0	1	0	0	0	0	0	2	7	0	0
2010	31	M	2	0	3	1	2	2	0	0	0	2	1	2	15	5	0	0
2010	59	M	0	1	0	0	0	0	0	0	0	0	0	0	1	5	0	0
2010	50	M	0	0	0	0	0	0	0	0	0	0	0	0	0	6	0	0
2010	53	M	0	0	0	0	0	0	0	0	0	1	0	0	1	8	0	0
2010	59	M	0	0	0	0	0	0	0	0	0	0	0	0	0	6	0	0
2010	42	M	0	0	0	0	0	0	0	0	0	0	0	0	0	7	0	0
2010	59	M	0	1	1	0	0	0	0	2	0	0	2	0	6	8	0	0
2010	41	M	0	0	0	0	0	0	0	0	0	0	0	0	0	5	0	0
2010	41	F	1	2	0	0	0	0	0	0	0	0	0	0	3	7	0	0
2010	35	F	0	0	0	0	0	0	0	0	0	0	0	0	0	7	0	0
2010	57	F	0	0	1	0	0	0	4	0	0	0	0	0	5	8	0	0
2010	54	F	0	0	0	0	0	0	3	0	3	1	2	0	9	6	0	0
2010	58	M	0	0	0	0	0	0	0	0	0	0	0	0	0	6	0	0
2010	42	F	1	0	1	0	0	0	0	0	0	0	1	0	3	7	0	0
2010	41	M	3	2	2	0	2	2	0	2	0	1	3	1	18	5	0	1
2010	42	M	1	0	1	0	0	0	0	0	0	0	0	0	2	6	0	0
2010	43	M	1	1	1	1	0	1	1	0	0	1	0	0	7	7	0	0
2010	60	M	0	0	0	0	0	0	0	0	0	1	1	0	2	8	0	0
2010	58	M	0	0	0	0	0	0	0	0	0	0	0	0	0	6	0	1
2010	67	F	0	0	0	0	0	0	0	0	0	0	0	0	0	7	0	0
2010	44	F	0	2	0	2	0	0	0	0	2	0	0	0	6	7	0	0
2010	54	F	1	1	0	0	0	1	0	0	0	1	1	0	5	5	0	0
2010	58	M	2	1	1	0	0	1	0	0	0	1	0	1	7	8	0	0
2010	62	F	1	1	1	0	0	0	1	0	0	0	1	0	5	7	0	0
2010	55	M	1	1	0	0	0	1	0	3	0	2	2	2	12	6	0	0
2010	52	M	0	2	0	0	0	0	0	0	0	0	0	0	2	7	0	0
2010	60	M	0	1	0	0	0	0	0	0	0	0	0	0	1	6	0	0
2010	55	M	0	0	0	0	0	0	0	0	0	0	0	0	0	6	0	0
2010	62	F	1	0	1	0	0	0	0	0	0	0	0	0	2	9	0	0
2010	64	M	0	0	0	0	0	0	0	0	0	0	0	0	0	7	0	0
2010	57	M	0	1	1	0	0	0	0	0	0	1	2	1	6	6	0	0
2010	47	M	0	0	2	1	0	1	3	2	2	2	2	0	15	6	0	0
2010	45	M	0	0	0	0	0	0	0	0	0	0	0	0	0	5	0	0
2010	43	F	0	2	2	0	1	0	0	0	0	0	0	0	5	6	0	0
2010	60	F	1	0	0	0	0	0	0	0	0	1	1	0	3	6	0	0
2010	57	M	2	0	0	1	0	2	0	0	0	2	0	0	7	6	0	1
2010	59	F	2	1	3	0	2	2	4	1	4	3	0	0	22	6	0	0
2010	51	M	1	3	1	0	0	0	2	1	2	1	1	0	12	5	0	0
2010	63	M	0	0	0	0	0	0	0	0	0	0	0	0	0	8	0	0
2010	29	M	1	0	0	0	0	1	0	1	0	1	0	0	4	7	0	0
2010	46	M	0	0	0	0	0	0	0	0	0	0	0	0	0	7	0	0
2010	47	F	0	1	0	0	0	0	0	0	0	0	0	0	1	7	0	0
2010	40	F	0	0	0	0	0	0	0	0	0	0	0	0	0	7	0	0
2010	38	M	0	0	0	0	0	0	0	0	0	0	0	0	0	5	0	0
2010	35	M	0	0	0	0	0	0	0	0	0	0	0	0	0	6	0	0
2010	58	F	0	0	0	0	1	1	0	1	0	0	1	0	4	5	0	0
2010	62	M	1	0	1	0	0	1	0	1	0	1	0	0	5	8	0	0
2010	58	F	1	1	1	0	0	1	0	1	0	1	2	0	8	6	0	0
2010	60	M	0	1	1	0	0	0	0	0	1	0	1	0	4	7	0	0
2010	65	M	0	0	0	0	0	0	0	0	0	0	0	0	0	6	0	0
2010	49	M	1	0	0	0	0	0	0	0	0	0	1	0	2	7	0	0
2010	44	F	0	2	0	0	0	0	1	1	0	1	0	0	5	6	0	0
2010	61	F	0	1	0	0	0	0	0	0	0	0	0	0	1	6	0	0
2010	50	M	1	2	2	0	0	1	1	1	0	1	1	1	11	6	0	0
2010	54	M	0	2	1	0	0	0	0	0	2	0	0	0	5	6	0	0
2010	51	F	2	3	3	1	1	1	1	0	0	0	0	0	12	5	0	0
2010	26	M	1	1	2	2	1	1	0	1	1	1	1	0	12	5	0	0
2010	53	F	0	2	1	0	0	0	0	0	0	0	1	0	4	5	0	0
2010	61	M	0	0	0	0	0	0	0	1	0	1	1	0	3	7	0	1
2010	74	M	0	0	0	0	0	0	0	0	0	0	0	0	0	6	0	0
2010	44	M	0	0	0	0	0	0	0	0	0	0	0	0	0	7	0	0
2010	47	M	0	3	2	0	0	0	4	0	0	0	0	0	9	6	0	0
2010	50	F	1	3	0	0	0	0	2	0	0	1	0	0	7	4	0	0
2010	58	M	0	0	0	0	0	0	0	0	0	1	0	0	1	6	0	0
2010	46	F	0	1	0	0	0	0	0	0	0	0	0	0	1	5	0	0
2010	40	M	0	0	0	0	0	0	0	0	0	0	0	0	0	7	0	0
2010	38	M	0	0	0	0	0	0	1	0	0	0	0	0	1	7	0	0
2010	41	F	1	1	1	1	0	0	0	0	0	0	1	0	5	6	0	0
2010	27	M	0	0	2	0	2	0	0	0	0	0	0	0	4	6	0	0
2010	66	M	0	1	1	0	1	1	0	1	0	1	2	0	8	6	0	0
2010	52	M	0	1	1	0	0	0	0	0	0	0	0	0	2	7	0	0
2010	51	F	0	2	2	0	0	0	0	0	0	0	0	0	4	6	0	0
2010	56	M	0	0	0	0	0	0	0	0	0	0	0	0	0	6	0	0
2010	35	M	1	1	0	0	0	1	0	0	0	1	1	1	6	6	0	0
2010	34	F	0	1	0	0	0	0	3	0	0	0	0	0	4	6	0	0
2010	55	M	2	3	2	0	0	2	2	2	0	1	1	1	16	5	0	0
2010	30	M	3	3	3	2	2	3	4	3	4	4	3	2	36	5	0	0
2010	54	F	1	1	1	0	1	1	0	0	1	1	0	1	8	7	0	0
2010	42	F	1	1	1	1	0	1	0	0	0	0	1	0	6	8	0	0
2010	50	F	0	0	1	0	0	0	0	0	0	0	0	0	1	6	0	0
2010	44	F	0	0	0	0	0	0	0	0	0	0	0	0	0	8	0	0
2010	37	F	2	0	0	0	0	1	0	0	0	0	0	0	3	7	0	0
2010	40	M	0	0	0	0	0	0	0	0	0	0	0	0	0	6	0	0
2010	40	M	0	0	0	0	0	0	0	0	0	0	0	0	0	5	0	0
2010	38	F	0	2	0	0	1	0	0	0	0	0	0	0	3	6	0	0
2010	45	F	0	0	0	0	0	0	0	0	0	0	0	0	0	6	0	0
2010	46	F	1	0	1	0	0	0	0	0	0	0	0	0	2	5	0	0
2010	44	M	3	3	3	0	0	3	0	0	0	1	2	1	16	5	0	0
2010	55	M	0	2	0	0	0	0	0	0	0	0	0	0	2	8	0	0
2010	54	F	0	1	1	0	0	0	2	1	0	0	1	1	7	5	0	0
2010	58	M	2	1	1	0	1	2	1	2	1	1	3	1	16	6	0	0
2010	56	M	0	0	0	0	0	0	0	0	0	0	0	0	0	7	0	0
2010	56	M	2	2	1	0	0	1	3	1	1	1	3	0	15	6	0	0
2010	50	M	2	1	0	0	0	0	0	1	0	3	1	0	8	7	0	0
2010	60	F	0	0	0	0	0	0	0	0	0	0	0	0	0	4	0	0
2010	40	F	0	0	0	0	0	0	0	0	0	0	0	0	0	5	0	0
2010	50	F	0	0	0	0	0	0	0	0	0	0	0	0	0	7	0	0
2010	50	M	0	0	0	0	0	0	0	0	0	0	0	0	0	6	0	0
2010	49	F	0	0	0	0	0	0	0	0	0	0	0	0	0	5	0	0
2010	62	F	3	1	3	2	2	3	0	1	1	0	0	0	16	6	0	0
2010	55	F	0	0	0	0	0	0	0	0	0	0	0	0	0	7	0	0
2010	53	F	1	0	1	0	1	1	0	0	0	0	0	0	4	6	0	0
2010	45	F	2	0	1	0	0	0	0	1	3	0	1	0	8	6	0	0
2010	44	F	0	1	1	0	0	0	0	0	0	0	0	0	2	5	0	0
2010	55	M	0	3	1	0	0	0	3	0	1	1	2	0	11	6	0	0
2010	59	F	0	1	0	0	0	0	1	1	0	0	0	0	3	7	0	0
2010	57	M	0	1	1	0	0	0	0	0	0	1	0	0	3	7	0	0
2010	48	M	1	0	0	0	0	0	0	0	0	0	0	0	1	6	0	0
2010	58	M	1	1	1	0	0	0	2	0	1	1	1	0	8	6	0	0
2010	58	M	0	0	0	0	0	0	0	0	0	0	0	0	0	7	0	0
2010	47	M	0	0	0	0	0	0	0	0	0	0	0	0	0	5	0	0
2010	46	M	0	4	0	0	2	0	0	0	0	2	2	0	10	6	0	0
2010	36	F	1	1	1	0	1	1	0	1	0	1	1	0	8	7	0	0
2010	40	M	1	1	1	0	0	1	1	0	1	1	2	0	9	5	0	0
2010	44	M	1	1	1	0	0	1	3	0	0	0	1	0	8	7	0	0
2010	44	M	0	0	0	0	0	0	0	0	0	0	2	0	2	5	0	0
2010	40	M	0	1	0	0	0	0	0	0	0	1	0	0	2	5	0	0
2010	40	M	0	1	1	0	0	1	0	0	0	0	0	0	3	6	0	0
2010	40	M	0	3	2	0	0	0	0	2	0	1	4	0	12	7	0	0
2010	52	M	0	0	1	0	0	1	0	1	0	1	1	0	5	6	0	0
2010	44	M	1	1	2	0	0	1	0	0	0	1	0	0	6	7	0	1
2010	43	M	2	3	2	0	1	2	2	0	0	1	1	2	16	7	0	0
2010	37	F	1	2	1	0	0	1	0	0	0	0	1	0	6	7	0	0
2010	37	F	0	0	1	0	0	0	0	0	0	0	0	0	1	6	0	0
2010	43	M	2	0	0	0	0	0	0	0	0	0	0	0	2	6	0	0
2010	56	M	2	0	0	0	0	0	0	0	0	1	2	0	5	8	0	0
2010	58	M	0	1	0	0	0	0	0	1	0	0	0	0	2	8	0	0
2010	58	M	0	1	0	1	0	0	0	0	0	0	0	0	2	6	0	0
2010	57	F	1	0	0	0	0	1	0	0	0	1	0	0	3	7	0	0
2010	60	M	0	0	0	0	0	0	0	0	0	0	0	0	0	6	0	0
2010	61	F	0	0	0	0	0	0	2	0	2	0	0	0	4	7	0	0
2010	46	M	1	0	0	0	0	0	0	0	0	0	0	0	1	6	0	0
2010	57	M	0	0	0	0	0	0	2	0	0	1	1	0	4	6	0	0
2010	58	F	0	0	0	0	0	0	0	0	1	1	0	0	2	6	0	0
2010	58	F	2	1	2	1	0	1	0	0	0	0	0	1	8	6	0	0
2010	37	F	0	0	1	0	0	0	0	0	0	0	0	1	2	4	0	0
2010	50	F	2	2	2	0	1	1	2	1	1	2	2	1	17	8	0	1
2010	58	F	0	0	0	0	0	0	0	0	0	1	0	0	1	9	0	0
2010	54	M	0	0	1	0	0	1	3	1	0	0	0	0	6	7	0	0
2010	56	M	0	0	0	0	0	0	0	0	0	2	2	0	4	5	0	0
2010	56	M	0	0	0	0	0	0	0	0	0	0	0	0	0	5	0	0
2010	42	M	0	0	0	0	0	0	1	0	0	1	0	0	2	5	0	0
2010	41	M	0	2	1	0	0	1	2	1	1	0	1	0	9	6	0	0
2010	44	F	1	2	2	1	2	2	0	2	0	2	2	0	16	6	0	0
2010	63	F	1	1	1	0	0	0	0	0	0	1	0	0	4	6	0	0
2010	43	F	1	1	1	1	0	1	0	0	0	0	2	0	7	6	0	0
2010	59	M	0	0	0	0	0	0	0	0	0	0	0	0	0	7	1	0
2010	50	M	0	0	1	0	0	0	0	0	0	0	0	0	1	6	0	0
2010	41	M	0	2	0	0	0	0	0	0	0	0	0	0	2	6	0	0
2010	38	M	0	1	1	0	0	0	0	1	0	0	1	0	4	4	0	0
2010	36	F	0	0	0	0	0	0	0	0	0	0	2	0	2	5	0	0
2010	32	M	1	1	1	0	0	1	1	1	0	1	0	0	7	6	0	0
2010	63	M	0	0	0	0	0	0	0	1	0	1	0	0	2	6	0	0
2010	51	M	1	1	1	0	1	1	0	0	1	1	1	1	9	5	0	0
2010	57	M	0	0	0	0	0	0	0	0	0	0	0	0	0	7	0	0
2010	49	F	1	2	1	0	0	1	0	0	0	2	1	0	8	7	0	0
2010	59	M	0	1	0	0	0	2	0	0	0	0	0	0	3	7	0	0
2010	55	M	2	1	2	0	0	2	0	1	0	0	1	0	9	7	0	0
2010	54	F	0	0	0	0	0	0	0	0	0	0	0	0	0	5	0	0
2010	52	F	0	1	1	0	1	1	0	0	1	1	0	0	6	8	0	0
2010	52	M	0	1	1	0	0	0	0	0	1	0	1	0	4	7	0	0
2010	62	M	0	0	0	0	0	0	0	0	1	0	1	0	2	6	0	0
2010	50	M	0	0	0	0	0	0	0	0	0	0	0	0	0	7	0	0
2010	52	M	0	1	1	0	0	0	1	0	0	2	3	0	8	6	0	0
2010	51	F	0	0	0	0	0	0	0	0	0	0	0	0	0	7	0	0
2010	47	M	0	1	0	0	0	0	0	0	0	0	0	0	1	5	0	0
2010	56	F	2	2	2	1	1	2	1	0	0	1	2	2	16	6	0	0
2010	59	F	0	1	0	0	0	0	2	0	0	0	0	0	3	7	0	0
2010	57	M	2	2	1	0	0	2	2	0	0	3	0	2	14	7	0	0
2010	53	F	0	2	0	0	0	0	0	1	0	0	1	0	4	6	0	0
2010	59	M	0	0	0	0	0	0	0	0	0	0	0	0	0	7	0	0
2010	50	M	0	0	0	0	0	0	0	0	0	0	0	0	0	6	0	0
2010	38	M	1	3	2	0	1	1	1	0	0	1	1	0	11	6	0	0
2010	45	M	0	1	1	0	0	0	0	0	0	0	0	0	2	5	0	0
2010	43	F	2	3	2	0	2	1	0	2	2	2	2	0	18	6	0	0
2010	45	M	0	0	0	0	0	0	0	0	0	0	0	0	0	7	0	0
2010	41	M	3	1	2	2	0	2	0	0	0	1	1	1	13	6	0	0
2010	58	F	0	0	0	0	0	0	0	0	0	0	0	0	0	7	0	0
2010	58	M	0	2	0	0	0	0	0	0	0	0	0	0	2	6	0	0
2010	55	M	1	3	1	0	0	1	0	1	0	0	2	0	9	7	0	0
2010	53	M	1	2	2	0	0	0	0	1	0	1	3	0	10	8	0	0
2010	54	M	2	2	2	0	1	2	0	0	0	2	3	1	15	8	0	0
2010	50	F	0	1	1	0	1	0	0	0	0	0	0	0	3	5	0	0
2010	50	M	0	0	0	0	0	0	0	0	0	0	0	0	0	7	0	0
2010	57	M	1	2	0	0	0	0	0	0	0	1	3	1	8	5	0	1
2010	51	F	1	1	1	2	1	1	0	2	0	1	1	1	12	6	0	0
2010	42	F	2	2	2	0	0	1	0	0	0	0	0	0	7	7	0	0
2010	42	F	2	0	2	0	1	1	3	1	0	0	0	0	10	5	0	0
2010	40	F	1	1	0	0	0	0	0	0	0	0	1	0	3	6	0	0
2010	58	F	0	2	0	0	0	0	0	0	0	0	0	0	2	6	0	0
2010	36	F	0	0	0	0	0	0	2	0	0	1	1	0	4	6	0	0
2010	42	F	0	2	0	0	0	0	0	0	0	0	0	0	2	8	0	0
2010	38	M	1	0	2	0	0	0	0	0	0	0	0	0	3	7	0	0
2010	46	F	2	0	2	0	0	2	0	0	0	2	1	0	9	6	0	0
2010	46	F	0	0	1	0	0	1	0	0	0	0	1	0	3	6	0	0
2010	53	M	0	1	0	0	0	0	4	0	0	0	0	0	5	5	0	0
2010	41	F	0	0	0	0	0	0	0	0	0	0	0	0	0	6	0	0
2010	54	M	0	0	0	0	0	0	0	0	0	0	0	0	0	6	0	0
2010	56	M	3	2	1	0	0	1	0	0	0	2	3	4	16	8	0	0
2010	42	F	2	1	1	1	0	2	2	0	0	0	2	1	12	7	0	0
2010	38	M	0	0	0	1	0	0	0	0	0	2	1	1	5	6	0	0
2010	39	F	1	0	0	0	1	1	0	1	0	0	0	0	4	7	0	0
2010	44	F	2	2	3	0	0	2	0	0	0	1	2	0	12	6	0	0
2010	34	M	0	0	0	0	0	0	0	0	0	0	0	0	0	7	0	0
2010	51	F	1	1	1	0	1	1	0	1	2	1	1	0	10	6	0	0
2010	52	M	1	2	1	1	0	1	0	0	0	1	2	0	9	7	0	0
2010	59	M	0	0	1	0	0	0	0	0	0	0	0	0	1	7	0	0
2010	38	M	0	0	0	0	0	0	0	0	0	0	0	0	0	5	0	0
2010	47	F	0	0	0	0	0	0	0	0	0	0	0	0	0	6	0	0
2010	43	M	1	1	1	0	1	1	0	1	1	1	2	0	10	6	0	0
2010	35	F	0	0	0	0	1	0	0	2	0	0	2	0	5	7	0	0
2010	40	F	0	1	1	0	0	0	0	1	0	1	2	0	6	6	0	0
2010	41	F	0	0	0	0	0	0	0	0	0	0	0	0	0	7	0	0
2010	27	M	1	1	1	0	0	0	0	0	0	2	1	0	6	4	0	1
2010	54	M	1	1	0	0	0	1	0	0	0	1	1	0	5	5	0	0
2010	46	M	2	1	1	0	0	1	4	2	0	1	0	1	13	5	0	0
2010	52	M	2	3	4	1	3	2	3	0	0	1	0	0	19	6	0	0
2010	40	M	0	0	1	1	1	0	0	0	0	0	0	0	3	6	0	0
2010	41	F	1	0	2	0	0	0	1	0	0	0	0	0	4	7	0	0
2010	30	F	0	0	2	0	0	0	0	2	0	2	0	0	6	5	0	0
2010	41	F	1	1	0	0	0	0	0	0	0	0	0	0	2	7	0	0
2010	55	M	2	1	0	0	0	0	0	1	0	0	0	0	4	6	0	0
2010	47	F	0	2	0	0	0	0	1	1	1	0	0	0	5	5	0	0
2010	74	F	0	0	0	0	0	0	0	0	0	0	0	0	0	8	0	0
2010	43	M	1	0	1	0	0	0	0	0	0	0	0	0	2	6	0	0
2010	39	F	0	1	1	0	0	0	0	1	0	0	1	0	4	4	0	0
2010	57	M	1	0	1	0	0	0	0	0	0	1	1	0	4	7	0	0
2010	53	M	2	2	1	1	0	1	0	1	0	2	2	1	13	7	0	0
2010	53	M	0	0	0	2	0	0	0	3	0	0	0	0	5	6	0	0
2010	53	M	0	0	0	0	0	0	0	0	0	0	0	0	0	7	0	0
2010	52	M	2	2	1	0	0	0	0	0	0	0	0	0	5	6	0	1
2010	51	M	0	2	0	0	0	0	0	0	0	0	0	0	2	6	0	0
2010	57	M	1	1	0	0	0	1	1	0	1	0	1	0	6	7	0	0
2010	58	M	1	2	1	0	1	1	1	0	1	1	4	0	13	6	0	0
2010	59	M	0	0	0	0	0	0	0	0	1	0	0	0	1	4	0	0
2010	57	F	2	0	2	0	0	0	0	2	0	2	2	0	10	7	0	0
2010	56	M	2	0	1	1	0	2	0	2	0	1	0	0	9	6	0	0
2010	60	M	0	0	0	0	0	0	0	0	0	0	0	0	0	6	0	0
2010	60	M	0	0	1	0	0	2	0	0	0	1	0	0	4	5	0	0
2010	56	F	2	1	2	0	1	2	0	0	0	1	0	0	9	6	0	0
2010	53	M	2	2	1	0	0	1	0	0	0	0	0	0	6	5	0	0
2010	59	M	0	3	3	0	0	0	0	2	0	2	0	0	10	5	0	0
2010	60	M	1	2	0	1	0	0	0	0	0	0	0	0	4	6	0	0
2010	54	M	0	0	0	0	0	0	0	0	1	0	1	0	2	7	0	0
2010	58	F	1	1	1	1	1	1	0	1	1	0	1	1	10	6	0	0
2010	60	M	1	1	2	0	1	1	0	0	0	1	1	0	8	7	0	0
2010	49	M	0	0	1	0	0	0	0	0	0	0	0	0	1	5	0	0
2010	42	M	0	1	1	0	0	1	0	1	0	0	0	0	4	6	0	0
2010	54	M	0	0	0	0	0	0	0	0	0	0	1	0	1	3	0	0
2010	60	M	0	0	0	0	0	0	0	0	0	0	0	0	0	6	0	0
2010	47	F	0	0	1	0	0	0	0	0	0	0	0	0	1	6	0	0
2010	55	M	0	3	0	0	0	0	0	0	0	0	1	0	4	5	0	0
2010	51	M	1	1	1	0	0	0	0	0	0	0	0	0	3	7	0	1
2010	49	M	1	1	1	0	0	1	0	0	0	0	0	0	4	6	0	0
2010	40	F	2	3	4	2	4	2	3	3	3	2	0	2	30	5	0	0
2010	55	M	1	1	1	0	0	1	1	0	0	0	0	0	5	6	0	0
2010	47	F	1	1	0	0	0	0	0	0	0	1	0	1	4	5	0	0
2010	52	M	2	2	2	0	2	2	2	0	0	0	0	0	12	5	0	0
2010	56	M	0	1	2	0	0	0	2	1	0	0	0	0	6	6	0	0
2010	39	F	0	0	0	0	0	0	0	0	0	0	0	0	0	6	0	0
2010	40	M	2	0	0	2	0	0	0	0	0	2	2	1	9	5	1	0
2010	47	M	0	0	0	0	0	0	0	0	0	0	1	0	1	6	0	0
2010	34	F	2	1	3	0	2	2	0	1	0	0	1	0	12	6	0	0
2010	55	F	0	0	0	0	0	0	0	0	0	0	0	0	0	7	0	0
2010	45	M	1	1	1	0	0	1	1	0	1	1	3	0	10	7	0	0
2010	55	M	1	2	0	0	0	1	0	0	0	1	2	0	7	5	0	0
2010	68	M	1	0	1	0	0	1	0	0	0	0	0	0	3	7	0	0
2010	41	M	2	0	0	1	0	0	1	0	1	0	0	0	5	6	0	0
2010	43	F	0	2	0	0	0	0	0	0	0	0	2	0	4	5	0	0
2010	59	M	1	2	1	0	0	0	0	0	0	1	1	0	6	6	0	0
2010	37	F	0	1	1	0	0	1	0	0	0	0	2	0	5	7	0	0
2010	45	F	0	0	0	0	0	0	0	0	0	0	0	0	0	7	0	0
2010	43	F	0	0	0	0	0	0	0	0	0	0	0	0	0	6	0	0
2010	46	F	2	3	2	0	0	2	0	0	0	0	0	0	9	5	1	0
2010	52	M	0	0	0	0	0	0	2	1	1	0	0	0	4	7	0	0
2010	57	F	1	2	0	0	0	0	0	0	0	0	0	0	3	7	0	0
2010	56	F	0	0	0	0	0	0	0	0	0	0	0	0	0	7	0	0
2010	41	F	0	1	1	0	0	0	1	1	0	2	3	0	9	8	0	0
2010	47	M	0	0	0	0	0	0	0	0	0	0	0	0	0	6	0	0
2010	54	M	0	2	0	0	0	0	0	0	0	0	1	0	3	5	0	0
2010	40	M	0	1	0	0	0	0	0	0	0	0	0	0	1	6	0	0
2010	37	M	2	2	1	0	0	2	0	0	0	0	0	0	7	8	0	0
2010	36	M	0	0	1	1	0	0	0	0	1	1	2	0	6	6	0	0
2010	43	F	0	3	0	0	0	0	0	0	0	0	0	0	3	5	0	0
2010	50	F	0	1	1	0	0	0	0	0	0	0	0	0	2	4	0	0
2010	59	F	0	2	1	0	0	0	0	0	1	1	1	0	6	7	0	0
2010	39	M	0	0	0	0	0	0	0	0	0	0	0	0	0	5	0	0
2010	61	F	0	1	0	0	0	0	0	0	0	0	0	0	1	7	0	0
2010	50	M	0	0	0	0	0	0	0	0	0	0	0	0	0	5	0	0
2010	48	M	0	1	0	0	0	0	0	0	0	0	0	1	2	6	0	0
2010	32	M	0	0	0	0	0	0	0	0	0	0	0	0	0	7	0	0
2010	50	M	0	2	0	0	0	0	0	0	0	0	0	0	2	5	0	0
2010	53	F	0	1	0	0	0	0	0	0	0	0	0	0	1	5	0	0
2010	52	M	2	1	1	0	0	2	0	0	0	0	1	0	7	6	0	0
2010	57	M	0	1	0	0	0	0	1	0	0	0	0	0	2	5	0	0
2010	56	F	1	0	1	0	0	1	0	0	0	0	0	0	3	7	0	0
2010	64	M	2	3	1	0	0	0	0	0	0	0	0	0	6	6	0	0
2010	61	F	0	0	1	0	0	0	0	0	0	0	0	0	1	6	0	0
2010	61	F	2	0	0	0	0	2	0	0	0	0	0	0	4	8	1	0
2010	55	M	1	0	0	0	0	1	1	0	0	0	0	0	3	6	0	0
2010	54	F	1	1	1	0	0	1	0	0	0	0	0	0	4	6	0	0
2010	59	M	0	1	0	0	0	0	0	0	0	0	0	0	1	7	0	0
2010	43	F	0	0	1	0	1	0	0	0	0	1	0	0	3	6	0	0
2010	42	F	1	2	1	0	0	1	0	0	0	1	3	1	10	6	0	0
2010	50	M	2	2	2	0	2	2	0	0	0	0	0	0	10	6	0	0
2010	41	M	2	2	2	1	2	2	3	2	2	2	2	1	23	2	0	0
2010	72	M	2	2	1	0	0	1	0	0	0	1	0	1	8	7	0	0
2010	47	M	0	4	1	0	1	0	1	0	0	2	3	0	12	5	0	0
2010	40	M	1	0	1	0	0	0	0	0	0	0	0	0	2	6	0	0
2010	41	M	0	1	0	0	0	0	0	0	0	0	0	0	1	6	0	0
2010	42	F	0	0	0	0	0	0	0	0	0	0	2	0	2	6	0	0
2010	47	F	0	2	1	0	1	0	0	0	0	0	0	0	4	6	0	0
2010	39	M	0	0	0	0	0	0	0	0	0	0	0	0	0	7	0	0
2010	51	M	0	0	0	0	0	0	0	0	0	0	0	0	0	6	0	0
2010	47	M	1	1	0	0	0	1	0	0	0	0	0	0	3	5	0	0
2010	50	M	0	0	0	0	0	0	0	0	0	0	0	0	0	7	0	0
2010	48	M	0	0	2	0	0	0	0	1	0	0	0	0	3	6	0	0
2010	41	M	1	0	0	0	3	0	1	0	0	4	0	0	9	6	0	0
2010	55	M	0	1	1	0	0	0	0	0	0	1	0	0	3	5	0	0
2010	59	M	0	0	0	0	0	0	0	0	3	0	0	0	3	6	0	0
2010	56	M	3	3	3	0	0	3	2	0	0	2	2	2	20	8	0	0
2010	61	M	0	0	1	0	0	0	0	0	0	0	0	0	1	7	0	0
2010	59	M	1	1	1	0	0	0	0	0	2	1	0	0	6	4	0	0
2010	39	F	0	4	1	1	0	0	0	0	0	0	1	1	8	6	0	0
2010	40	F	0	0	0	0	1	0	1	0	0	0	4	0	6	2	0	0
2010	41	M	1	0	0	0	0	0	0	0	2	0	0	0	3	5	0	0
2010	29	M	0	0	0	0	0	0	0	0	0	0	0	0	0	6	0	0
2010	39	F	0	0	0	0	0	0	0	0	0	1	0	0	1	9	0	0
2010	40	F	0	0	0	0	0	0	1	0	0	0	0	0	1	6	0	0
2010	43	M	0	2	0	0	0	0	0	0	0	0	0	0	2	7	0	0
2010	40	F	0	2	1	0	0	0	1	0	1	0	2	0	7	9	0	0
2010	54	F	1	1	1	0	1	0	0	0	0	0	1	0	5	6	0	0
2010	57	M	0	0	0	0	0	0	0	0	0	0	2	0	2	7	0	0
2010	40	M	0	0	1	0	0	0	0	0	0	0	1	0	2	5	0	0
2010	48	M	1	1	1	0	2	2	0	1	0	1	0	1	10	2	0	0
2010	63	M	1	1	1	0	1	1	0	0	1	1	1	0	8	6	1	0
2010	40	M	0	0	0	2	0	0	2	3	0	0	4	0	11	6	0	0
2010	64	M	0	0	0	0	0	0	0	0	0	0	0	0	0	6	0	0
2010	61	F	0	0	0	0	0	0	0	0	0	0	0	0	0	7	0	0
2010	41	F	0	2	0	0	0	0	0	0	0	0	0	0	2	7	0	0
2010	33	F	0	0	0	0	0	0	0	0	0	0	0	0	0	8	0	0
2010	45	F	1	1	1	1	0	0	0	0	1	0	0	0	5	6	0	0
2010	41	F	0	2	4	0	2	0	0	2	0	1	0	0	11	4	0	0
2010	33	M	2	1	2	2	1	1	0	0	0	0	0	0	9	6	0	0
2010	46	F	1	2	1	0	0	0	0	0	0	1	0	0	5	5	0	0
2010	44	M	0	0	2	2	0	0	0	1	1	0	0	0	6	7	0	0
2010	57	F	0	2	0	0	0	0	0	0	0	0	0	0	2	4	0	0
2010	48	F	1	2	1	0	0	1	1	0	0	0	1	0	7	6	0	0
2010	52	M	1	1	1	0	0	1	1	1	0	1	1	0	8	6	0	0
2010	61	F	0	0	0	0	0	0	0	0	0	0	0	0	0	8	0	0
2010	61	M	0	2	2	0	0	0	0	0	0	1	1	0	6	6	0	0
2010	53	M	1	1	0	0	0	0	0	0	0	1	1	0	4	6	1	0
2010	51	M	1	1	0	0	0	1	0	0	0	0	2	0	5	7	0	1
2010	50	M	0	1	0	0	0	0	0	0	0	1	0	0	2	7	0	0
2010	52	M	3	0	1	1	1	3	1	0	0	2	4	1	17	7	0	0
2010	53	M	0	1	1	0	0	0	0	1	0	1	1	0	5	6	0	0
2010	57	M	1	1	1	0	0	1	0	1	0	0	1	0	6	7	0	0
2010	55	M	1	1	1	0	1	1	1	0	0	1	2	0	9	7	0	0
2010	60	M	1	2	1	1	0	0	0	0	0	0	1	0	6	6	0	0
2010	57	F	0	1	0	0	0	0	0	0	0	0	0	0	1	5	0	0
2010	54	F	1	0	1	0	0	0	0	0	0	2	0	0	4	7	0	0
2010	53	M	0	1	0	0	0	0	0	1	0	0	0	0	2	6	0	0
2010	49	F	2	2	2	3	1	2	0	0	0	2	0	2	16	6	0	0
2010	51	M	0	0	0	0	0	0	0	0	0	0	0	0	0	6	0	0
2010	47	F	0	0	0	0	0	0	0	0	0	0	0	0	0	6	0	0
2010	56	M	0	0	0	0	0	0	0	0	0	0	0	0	0	7	0	0
2010	55	F	0	0	0	0	0	0	0	0	0	0	0	0	0	7	0	0
2010	45	M	2	4	1	1	1	1	1	3	0	0	1	0	15	5	0	0
2010	52	M	0	0	0	0	0	0	0	0	0	0	0	0	0	6	0	0
2010	48	M	1	2	1	0	1	1	0	0	0	1	0	0	7	6	0	0
2010	57	F	0	0	0	0	0	0	0	0	0	1	1	0	2	7	0	0
2010	41	M	0	1	1	0	0	1	0	0	0	0	0	0	3	6	0	0
2010	47	M	0	0	0	0	0	0	0	0	0	1	1	0	2	8	0	0
2010	43	F	0	0	0	0	0	0	0	0	0	0	0	0	0	6	0	0
2010	50	F	0	0	0	0	0	0	0	0	0	0	0	0	0	7	0	0
2010	53	F	0	0	0	0	0	0	2	0	2	2	0	0	6	6	0	0
2010	43	M	0	0	0	0	0	0	0	0	0	0	0	0	0	4	0	0
2010	47	F	1	1	1	0	0	0	0	0	0	1	1	0	5	6	0	0
2010	44	M	0	0	0	0	0	0	2	0	0	1	2	0	5	5	0	0
2010	42	M	1	1	2	0	0	1	0	1	0	0	1	1	8	5	0	0
2010	63	M	2	2	2	0	1	2	2	1	2	2	1	0	17	6	0	0
2010	58	F	1	1	1	0	0	1	0	0	0	0	0	0	4	6	0	0
2010	56	F	0	0	0	0	0	0	0	0	0	0	0	0	0	6	0	0
2010	58	M	0	0	0	0	0	0	1	0	0	0	0	0	1	6	0	0
2010	61	M	0	0	0	0	0	0	0	0	0	0	0	0	0	8	0	0
2010	45	M	0	1	0	0	0	0	0	0	0	0	0	0	1	7	0	0
2010	44	M	0	1	0	0	0	0	0	0	0	0	0	0	1	7	0	0
2010	51	F	0	0	0	0	0	0	0	0	0	0	0	0	0	5	0	0
2010	45	M	1	3	1	0	0	1	0	1	0	0	0	0	7	7	0	0
2010	40	M	1	0	0	0	0	0	0	0	0	0	0	0	1	6	0	0
2010	51	M	2	1	1	1	0	1	1	1	1	1	1	1	12	7	0	0
2010	43	F	0	1	0	0	0	0	0	0	0	0	0	0	1	6	0	0
2010	42	M	0	0	0	0	0	0	0	0	0	1	1	0	2	6	0	0
2010	54	F	0	0	1	0	0	0	0	0	0	0	0	0	1	7	0	0
2010	56	M	0	0	0	0	0	0	0	0	0	0	2	0	2	7	0	0
2010	37	F	0	0	0	0	0	1	0	0	0	0	0	0	1	5	0	0
2010	52	F	0	0	0	0	0	0	0	0	0	0	0	0	0	6	0	0
2010	40	F	0	0	0	0	0	0	0	0	0	0	0	0	0	7	0	0
2010	45	M	0	0	0	0	0	0	0	1	0	0	0	0	1	6	0	0
2010	43	M	0	0	0	0	0	0	0	0	0	0	0	0	0	6	0	0
2010	42	M	1	1	1	0	0	0	0	0	0	0	0	0	3	7	0	0
2010	37	F	0	0	0	0	0	0	0	0	0	0	0	0	0	7	0	0
2010	56	M	2	2	1	2	0	3	0	0	0	3	3	3	19	5	0	1
2010	41	F	2	0	2	1	2	2	3	2	0	1	1	1	17	8	0	0
2010	41	M	1	0	0	0	0	0	0	0	0	0	0	0	1	6	0	0
2010	36	M	0	1	2	0	1	0	0	0	0	1	2	0	7	5	0	0
2010	60	F	3	2	3	3	3	3	0	0	1	3	4	3	28	7	0	0
2010	37	M	0	1	0	0	0	0	2	0	0	0	1	0	4	6	0	0
2010	60	M	0	0	0	0	0	0	0	0	0	0	0	0	0	6	0	0
2010	48	M	0	1	0	0	0	0	0	0	0	0	1	0	2	6	0	0
2010	41	M	0	0	0	0	0	0	0	0	0	0	0	0	0	6	0	0
2010	69	M	0	1	0	0	0	0	0	2	0	0	0	0	3	6	0	0
2010	62	M	0	0	1	0	0	0	0	0	0	0	2	0	3	7	0	0
2010	64	M	1	1	1	0	0	0	0	1	1	1	1	0	7	6	0	0
2010	61	F	0	0	1	0	0	1	0	0	0	1	1	0	4	7	0	0
2010	61	M	1	1	1	0	0	1	1	0	0	2	0	0	7	7	0	0
2010	58	F	0	0	0	0	0	0	0	1	0	0	0	0	1	6	0	0
2010	41	M	0	0	0	0	0	0	0	0	0	0	0	0	0	7	0	0
2010	42	M	0	2	0	0	0	0	0	0	0	0	0	0	2	6	0	0
2010	62	M	1	0	1	0	0	1	0	1	1	1	1	0	7	8	0	0
2010	49	M	0	1	0	0	0	0	0	0	0	0	1	0	2	7	0	0
2010	36	F	0	0	0	0	0	0	0	1	0	0	0	0	1	5	0	0
2010	62	M	1	0	0	0	0	0	0	0	0	1	1	0	3	8	0	0
2010	60	F	0	0	0	0	0	0	0	0	0	0	0	0	0	7	0	0
2010	36	F	1	4	1	0	0	0	2	0	0	0	0	0	8	5	0	0
2010	36	F	0	1	0	0	0	0	1	0	0	0	0	0	2	6	0	0
2010	38	F	0	0	0	0	0	0	0	0	0	0	0	0	0	7	0	0
2010	33	M	2	2	2	2	2	2	0	1	0	3	0	0	16	5	0	0
2010	62	M	1	0	0	0	0	0	0	0	0	1	0	1	3	7	0	0
2010	53	M	0	0	0	0	0	0	1	0	0	0	0	0	1	6	0	0
2010	45	F	2	2	1	0	0	1	0	0	0	0	0	1	7	5	0	0
2010	42	F	0	0	0	0	0	0	0	2	0	0	0	0	2	7	0	0
2010	52	F	2	1	2	1	1	2	0	0	0	2	1	1	13	7	0	0
2010	45	F	0	0	0	0	0	0	0	0	0	0	0	0	0	6	0	0
2010	61	M	0	0	0	0	0	0	1	0	0	0	0	0	1	7	0	0
2010	36	F	0	0	0	0	0	0	0	0	0	0	0	0	0	8	0	0
2010	34	M	1	1	0	0	0	1	0	0	0	1	0	0	4	8	0	0
2010	67	F	0	0	0	0	0	0	0	0	0	1	0	0	1	7	0	0
2010	59	M	0	0	0	0	0	0	0	0	0	0	0	0	0	8	0	0
2010	54	M	1	1	1	1	0	0	0	0	0	1	0	0	5	7	0	0
2010	54	M	0	0	0	0	0	0	0	0	0	0	0	0	0	5	0	0
2010	51	F	0	0	0	0	0	0	0	0	0	0	0	0	0	7	0	0
2010	56	F	1	0	2	0	0	1	0	0	0	1	4	0	9	7	0	0
2010	52	M	0	0	0	0	0	0	0	0	0	0	0	0	0	6	0	0
2010	60	M	0	1	0	0	0	1	0	1	0	0	1	0	4	7	0	0
2010	42	M	1	0	0	0	0	0	0	0	0	0	0	1	2	6	0	0
2010	60	M	1	1	1	0	1	1	0	1	0	1	2	0	9	6	0	0
2010	67	M	0	1	0	0	0	0	0	0	0	0	0	0	1	6	0	0
2010	57	M	0	0	0	0	0	0	0	0	0	0	0	0	0	6	0	0
2010	60	F	0	0	0	0	0	0	0	0	0	0	0	0	0	7	0	0
2010	61	M	0	0	0	0	0	0	0	0	0	1	0	0	1	6	0	0
2010	49	F	0	0	0	0	0	0	0	0	0	0	0	0	0	6	0	0
2010	48	F	0	2	0	0	0	1	0	1	0	0	0	0	4	6	0	0
2010	45	M	1	0	0	0	1	1	0	1	0	0	0	0	4	6	0	0
2010	39	F	1	2	2	1	2	1	0	0	0	1	1	1	12	4	0	0
2010	43	M	1	3	1	1	0	1	1	2	1	1	2	0	14	6	0	0
2010	64	F	0	0	0	0	0	0	0	0	0	0	0	0	0	9	0	0
2010	41	F	3	4	3	0	0	2	2	0	0	0	1	0	15	5	0	0
2010	56	F	1	1	0	0	0	1	0	0	0	0	0	0	3	6	0	0
2010	41	M	0	0	1	0	0	0	0	0	0	0	0	0	1	7	0	0
2010	43	F	0	0	0	0	0	0	0	0	0	0	0	0	0	7	0	0
2010	42	F	0	0	0	0	0	0	0	0	0	0	0	0	0	6	0	0
2010	39	F	0	0	0	0	0	0	0	0	0	0	0	0	0	7	0	0
2010	50	M	3	3	0	0	1	0	0	0	0	0	0	0	7	7	0	0
2010	57	F	0	1	1	0	0	0	0	1	0	1	2	0	6	6	0	0
2010	54	F	0	2	2	0	0	2	3	0	2	0	0	0	11	6	0	0
2010	58	M	1	0	0	0	0	1	2	0	0	0	1	0	5	7	0	0
2010	42	M	0	0	0	0	0	0	0	0	0	0	0	0	0	7	0	0
2010	41	F	0	0	0	0	0	0	0	0	0	0	0	0	0	7	0	0
2010	45	M	0	0	0	0	0	0	0	0	0	2	1	0	3	6	0	0
2010	45	F	0	2	0	0	0	1	0	1	1	1	0	0	6	5	0	0
2010	45	M	1	3	0	0	0	1	1	2	0	1	1	0	10	5	0	0
2010	42	M	1	2	2	1	0	1	1	0	0	1	1	0	10	6	0	0
2010	40	F	0	0	1	0	0	0	0	0	0	0	0	0	1	6	0	0
2010	57	F	3	3	3	1	3	1	0	1	0	0	0	0	15	5	0	1
2010	52	F	1	2	1	0	1	1	0	2	0	1	1	0	10	6	0	0
2010	42	M	2	2	2	3	2	2	2	1	0	0	0	0	16	6	0	0
2010	44	M	1	0	0	0	0	0	0	0	0	0	0	0	1	6	0	0
2010	43	F	0	0	0	0	0	0	0	0	0	0	0	0	0	8	0	0
2010	48	M	1	2	2	0	2	2	0	4	1	0	0	0	14	6	0	0
2010	61	M	0	0	0	0	0	0	0	0	0	0	0	0	0	7	0	0
2010	42	M	1	1	1	0	0	1	0	0	0	2	1	0	7	6	0	0
2010	38	F	1	2	0	0	0	0	0	0	0	2	2	2	9	6	0	0
2010	45	F	2	2	2	0	2	2	0	0	0	0	0	0	10	8	0	1
2010	54	M	1	1	0	0	0	0	0	0	0	0	0	0	2	6	0	0
2010	44	M	0	1	0	0	0	0	1	2	0	0	1	0	5	6	0	0
2010	38	F	0	1	2	0	1	0	1	0	0	1	3	0	9	7	0	0
2010	58	M	1	0	0	0	0	1	2	0	1	1	1	0	7	5	0	0
2010	55	M	0	0	0	0	0	0	0	0	0	0	0	0	0	8	0	0
2010	57	M	0	0	0	0	0	0	0	0	1	0	0	0	1	6	0	0
2010	62	M	0	0	0	0	0	0	2	0	1	0	0	0	3	6	0	0
2010	59	M	1	1	0	0	0	1	0	0	2	1	2	0	8	7	0	0
2010	51	F	0	0	0	0	0	0	0	0	0	0	0	0	0	6	0	0
2010	38	M	3	0	2	2	0	0	0	0	0	2	2	1	12	8	0	0
2010	44	F	0	0	0	0	0	0	0	0	0	0	0	0	0	6	0	0
2010	45	F	0	1	0	0	0	1	0	0	0	0	0	0	2	7	0	0
2010	37	F	0	2	0	0	0	0	0	0	0	0	0	0	2	5	0	0
2010	55	F	0	1	0	0	0	0	0	1	0	0	0	0	2	7	0	0
2010	44	M	0	1	0	0	0	0	0	0	0	1	1	0	3	6	0	0
2010	43	F	1	0	1	0	0	0	1	0	1	1	1	0	6	6	0	0
2010	39	F	1	2	0	0	0	1	0	1	0	0	0	0	5	6	0	0
2010	49	M	2	2	2	0	0	2	0	0	0	0	0	0	8	7	0	0
2010	42	M	1	0	0	0	0	1	0	0	1	0	1	0	4	6	0	0
2010	45	F	0	0	0	0	0	0	0	2	0	0	0	0	2	6	0	0
2010	42	M	0	0	0	0	0	0	0	0	0	0	0	0	0	6	0	0
2010	36	F	0	3	1	0	1	0	0	0	0	0	0	0	5	6	0	0
2010	52	M	0	0	0	1	0	1	0	0	0	0	1	0	3	7	0	0
2010	61	M	0	0	1	0	0	0	0	0	0	0	0	0	1	7	0	0
2010	45	M	2	3	2	0	1	1	1	0	0	0	1	0	11	6	0	0
2010	51	F	0	2	0	0	0	0	0	1	0	0	0	0	3	7	0	0
2010	40	M	0	0	0	0	0	0	1	0	0	1	0	0	2	7	0	0
2010	34	F	3	0	3	1	0	3	1	0	1	1	1	0	14	6	0	0
2010	39	F	0	3	2	0	1	0	0	0	0	1	0	0	7	6	0	0
2010	57	M	0	0	0	0	1	0	0	0	0	0	1	0	2	4	0	0
2010	58	F	0	0	0	0	0	0	0	0	0	0	0	0	0	7	0	0
2010	58	M	0	0	0	0	0	0	0	0	0	0	0	0	0	7	0	0
2010	51	F	1	2	2	0	0	2	0	0	0	0	2	0	9	6	0	0
2010	50	F	0	1	1	0	0	0	0	0	0	0	0	0	2	7	0	0
2010	47	F	0	0	0	0	0	0	0	0	0	0	0	0	0	7	0	0
2010	47	F	0	0	0	0	0	0	0	0	0	0	0	0	0	6	0	0
2010	68	M	0	0	0	0	0	0	0	0	0	0	0	0	0	7	0	0
2010	60	M	1	1	2	0	0	0	1	0	1	1	0	1	8	8	0	0
2010	50	M	0	0	0	0	0	0	0	0	0	0	0	0	0	6	0	0
2010	57	M	0	0	0	0	0	0	0	0	0	0	2	0	2	7	0	0
2010	59	M	0	0	0	0	0	0	0	0	0	0	1	0	1	6	0	0
2010	61	F	0	0	0	0	0	0	0	0	0	0	0	0	0	8	0	0
2010	56	M	0	0	0	0	0	0	0	0	0	0	0	0	0	7	0	0
2010	60	F	1	2	2	0	1	1	0	0	1	2	3	0	13	5	0	0
2010	44	M	0	0	0	0	0	0	0	0	0	0	0	0	0	6	0	0
2010	47	M	0	0	0	0	0	0	0	0	0	0	0	0	0	5	0	0
2010	51	M	1	1	0	0	0	1	0	0	0	1	1	0	5	7	0	0
2010	52	M	0	0	0	0	0	2	0	0	0	0	0	0	2	8	0	0
2010	39	M	0	0	0	0	0	0	0	0	0	0	0	0	0	6	0	0
2010	50	M	1	0	1	0	0	0	0	0	0	0	0	0	2	6	0	0
2010	39	M	0	0	0	0	0	0	0	0	0	0	0	0	0	7	0	0
2010	64	F	0	0	0	0	0	0	0	0	0	0	0	1	1	5	0	0
2010	60	F	0	0	0	0	0	0	0	0	0	0	0	0	0	7	0	0
2010	54	F	0	0	0	0	0	0	0	0	0	0	0	0	0	7	0	0
2010	41	M	0	0	0	0	0	0	0	0	0	0	0	0	0	6	0	0
2010	40	F	0	0	0	0	1	0	0	0	0	1	0	0	2	7	0	0
2010	38	F	1	1	2	1	0	0	0	1	0	0	0	0	6	5	0	0
2010	46	F	0	0	0	0	0	0	0	0	0	0	0	0	0	7	0	0
2010	56	M	0	2	2	1	0	0	0	1	0	0	1	1	8	6	0	0
2010	58	F	1	1	0	0	0	1	0	0	1	0	1	0	5	6	0	0
2010	57	M	0	0	2	0	0	0	0	3	0	0	0	0	5	7	0	0
2010	44	F	0	2	0	0	0	0	0	0	0	0	1	0	3	6	0	0
2010	57	M	0	1	1	0	0	0	0	0	0	0	0	0	2	6	0	0
2010	55	M	1	1	1	1	0	1	0	0	0	1	2	0	8	5	0	0
2010	44	M	0	0	0	0	0	0	0	0	1	1	1	0	3	6	0	0
2010	39	F	0	0	2	0	0	0	0	0	0	0	0	0	2	6	0	0
2010	47	M	1	1	1	1	0	0	1	0	1	1	1	0	8	5	0	0
2010	43	F	0	0	0	0	0	0	0	0	0	0	0	0	0	5	0	0
2010	56	M	1	1	1	0	0	1	1	1	1	1	1	0	9	4	0	0
2010	52	M	3	3	3	3	0	3	0	0	0	2	1	3	21	6	0	0
2010	51	M	0	0	0	0	0	0	0	0	0	0	0	0	0	6	0	0
2010	59	M	0	0	0	0	0	0	0	0	0	0	0	0	0	6	0	0
2010	48	F	0	0	0	0	0	0	0	0	0	0	0	0	0	6	0	0
2010	45	F	1	0	3	0	0	1	0	2	0	0	3	0	10	6	0	0
2010	42	M	0	0	0	0	0	0	0	0	0	0	0	0	0	6	0	0
2010	58	M	0	0	0	0	0	0	0	0	0	0	2	0	2	7	0	1
2010	62	M	0	0	0	0	0	0	0	0	0	0	0	0	0	8	0	0
2010	52	M	0	0	0	0	0	0	0	0	0	0	0	0	0	6	0	0
2010	62	M	2	1	0	0	0	2	0	1	0	2	0	0	8	8	0	0
2010	52	M	1	0	1	0	0	1	0	0	0	1	1	0	5	7	0	0
2010	53	M	2	2	2	1	1	2	3	1	3	2	3	2	24	8	0	0
2010	45	M	0	3	2	0	0	0	0	0	0	2	0	0	7	6	0	0
2010	54	M	1	0	1	0	0	1	0	1	0	1	2	0	7	6	0	0
2010	65	M	0	0	0	0	0	0	0	0	0	0	0	0	0	7	0	1
2010	48	M	0	0	0	0	0	0	0	0	0	0	0	0	0	6	0	0
2010	44	M	0	0	0	0	0	0	0	0	0	0	0	0	0	6	0	0
2010	53	F	0	2	0	0	0	0	1	0	1	0	0	0	4	7	0	0
2010	55	M	1	0	0	0	0	0	0	1	0	0	0	0	2	6	0	0
2010	38	F	0	0	0	0	0	0	0	0	0	0	0	0	0	8	0	0
2010	38	F	1	2	2	1	0	0	2	1	3	3	4	0	19	5	0	0
2010	39	F	1	1	1	0	1	1	0	1	0	0	0	0	6	5	0	0
2010	47	M	1	0	0	0	0	1	1	0	0	1	0	1	5	6	0	0
2010	54	M	0	0	0	0	0	0	0	0	0	0	0	0	0	7	0	0
2010	62	F	0	0	0	0	0	0	0	0	0	0	0	0	0	5	0	0
2010	48	M	1	1	2	1	2	1	2	2	1	2	2	0	17	6	0	0
2010	44	M	0	1	0	0	1	1	0	1	0	1	2	0	7	6	0	0
2010	38	M	0	0	1	0	0	0	0	0	0	0	0	0	1	7	0	0
2010	48	F	0	1	0	0	0	0	0	0	0	0	0	0	1	5	0	0
2010	43	F	0	0	0	0	0	0	0	0	0	0	0	0	0	6	0	0
2010	53	F	0	1	1	0	0	0	0	0	0	1	1	0	4	6	0	0
2010	57	M	0	0	0	0	0	0	0	0	0	0	0	0	0	7	0	0
2010	51	M	0	0	0	0	0	0	1	0	0	1	1	0	3	6	0	0
2010	35	F	0	2	0	0	0	0	1	0	0	1	1	0	5	6	0	0
2010	35	F	0	1	2	0	1	0	1	0	0	0	0	0	5	6	0	0
2010	52	M	2	3	2	1	0	1	2	0	2	1	1	1	16	5	0	0
2010	48	M	2	1	1	0	0	1	2	1	0	2	2	2	14	6	0	0
2010	54	M	0	2	0	0	0	0	0	2	0	0	1	0	5	6	0	0
2010	52	M	0	1	0	0	0	0	0	0	0	0	0	0	1	7	0	0
2010	51	M	1	0	1	0	0	0	0	0	0	1	0	0	3	6	0	0
2010	58	M	1	2	0	0	0	2	0	0	0	0	3	0	8	7	0	0
2010	54	M	1	0	0	0	0	1	0	0	0	0	0	0	2	7	0	0
2010	55	F	1	1	1	0	0	1	0	0	1	0	2	0	7	6	0	0
2010	60	F	1	0	0	0	0	1	0	0	0	0	0	0	2	7	0	0
2010	60	F	0	1	0	0	0	0	1	1	0	0	0	0	3	9	0	0
2010	60	F	0	0	1	0	0	0	0	0	0	0	0	0	1	7	0	0
2010	51	M	0	1	0	0	0	0	0	0	0	0	0	0	1	6	0	0
2010	51	F	0	1	1	0	0	0	0	0	0	0	0	0	2	6	0	0
2010	47	F	0	0	0	0	0	0	0	0	0	0	0	0	0	6	0	0
2010	47	F	0	3	0	0	0	0	0	0	0	0	0	0	3	7	0	0
2010	51	F	0	1	0	0	0	0	3	1	0	1	1	0	7	6	0	0
2010	45	M	1	1	0	0	0	0	0	0	0	0	0	0	2	7	0	0
2010	44	M	0	0	0	0	0	0	0	0	0	0	1	0	1	7	0	0
2010	53	M	1	1	1	0	0	0	1	0	0	0	0	0	4	5	0	0
2010	40	F	1	1	1	0	0	0	0	0	0	0	1	0	4	6	0	0
2010	46	F	0	0	0	0	0	0	0	0	0	0	0	0	0	6	0	0
2010	55	M	1	2	2	0	1	1	0	0	0	1	0	0	8	6	0	0
2010	60	F	0	2	0	1	0	0	0	0	0	0	0	0	3	5	0	0
2010	51	M	3	1	1	0	0	2	0	0	0	2	3	0	12	7	0	0
2010	41	F	0	1	0	0	0	0	0	0	0	0	0	0	1	7	0	0
2010	47	M	0	0	0	0	0	0	0	0	0	0	0	0	0	6	0	0
2010	36	F	0	2	1	0	0	0	0	0	0	0	0	0	3	6	0	0
2010	45	M	0	0	0	0	0	0	0	0	0	0	0	0	0	6	0	0
2010	40	F	2	2	2	3	0	1	0	1	0	0	1	0	12	6	0	0
2010	63	M	0	1	0	0	0	0	1	0	0	0	0	0	2	6	0	0
2010	39	M	2	0	2	0	3	3	0	0	0	0	1	0	11	5	0	0
2010	53	F	2	1	1	0	0	1	1	2	0	0	0	1	9	7	0	0
2010	50	F	0	3	1	0	0	0	0	1	0	0	1	1	7	6	0	0
2010	44	F	0	0	0	0	0	0	0	0	0	0	0	0	0	6	0	0
2010	40	F	0	0	0	0	0	0	0	0	0	0	0	0	0	8	0	0
2010	43	M	1	0	2	0	1	1	0	0	0	1	0	1	7	5	0	0
2010	41	M	1	1	1	0	1	1	0	0	0	1	3	0	9	6	0	0
2010	41	F	2	2	3	4	0	2	0	1	0	1	2	1	18	7	0	0
2010	56	M	1	1	0	0	0	0	0	0	0	0	0	1	3	6	0	0
2010	51	M	2	4	0	0	0	2	0	2	0	1	0	0	11	7	0	0
2010	45	M	1	2	1	0	0	1	0	0	1	1	1	2	10	7	0	0
2010	55	M	0	0	0	0	0	0	0	0	0	0	0	0	0	5	0	0
2010	52	M	0	0	1	0	0	0	0	0	0	1	0	0	2	6	0	0
2010	44	F	0	1	0	0	0	0	0	0	0	0	4	0	5	7	0	0
2010	42	M	0	0	0	0	0	0	0	0	0	0	0	0	0	7	0	0
2010	59	F	0	0	0	0	0	0	0	0	0	0	0	0	0	6	0	0
2010	52	M	0	2	0	0	0	0	0	0	0	0	0	0	2	7	0	0
2010	49	F	1	2	2	0	0	1	0	2	0	0	0	0	8	6	1	0
2010	42	M	0	1	1	1	0	1	0	0	0	0	1	0	5	7	0	0
2010	35	F	0	0	0	0	0	0	2	0	0	0	0	0	2	7	0	0
2010	37	F	3	2	3	2	2	2	1	1	0	1	1	1	19	8	0	0
2010	36	F	0	1	0	0	0	0	0	1	1	1	0	0	4	6	0	0
2010	37	F	0	2	0	0	0	0	0	0	0	0	2	0	4	5	0	0
2010	42	M	1	0	0	0	0	1	0	0	0	0	0	0	2	8	0	0
2010	43	F	0	0	0	0	0	0	0	0	0	0	0	0	0	5	0	0
2010	40	M	1	0	0	0	1	1	0	0	0	0	0	0	3	5	0	0
2010	50	M	2	2	1	0	0	1	0	0	0	1	1	1	9	7	0	0
2010	47	M	1	1	0	0	0	1	0	0	0	1	1	0	5	5	0	0
2010	35	F	1	1	1	0	0	0	0	0	0	0	0	0	3	7	0	0
2010	58	M	0	0	0	0	0	0	0	0	0	0	0	0	0	6	0	0
2010	55	F	0	2	0	0	0	0	0	0	0	0	0	0	2	6	0	0
2010	57	M	2	2	2	2	0	2	0	1	0	0	1	1	13	6	0	0
2010	34	M	0	0	0	0	0	0	0	0	0	0	0	0	0	8	0	0
2010	60	M	0	2	1	0	0	0	0	0	0	0	1	0	4	6	0	0
2010	63	F	0	0	1	0	0	0	0	0	0	0	0	0	1	6	0	0
2010	53	M	1	2	1	1	0	1	1	1	1	1	1	0	11	4	0	0
2010	55	M	2	0	3	0	1	2	0	2	2	2	0	0	14	6	0	0
2010	56	M	0	2	0	0	0	0	0	0	0	0	1	0	3	7	0	0
2010	59	M	0	1	0	0	0	0	1	0	0	1	1	0	4	5	0	0
2010	59	F	0	1	0	0	0	0	0	0	0	0	0	0	1	7	0	0
2010	45	M	1	1	1	0	0	0	0	0	0	0	2	0	5	6	0	0
2010	54	M	0	0	0	0	0	0	0	0	0	2	1	0	3	7	0	0
2010	47	M	0	1	0	0	0	0	0	0	0	0	0	0	1	5	0	0
2010	46	M	2	2	2	0	0	1	0	0	0	0	1	0	8	7	0	0
2010	56	M	2	2	2	0	2	1	4	1	4	0	0	0	18	8	1	0
2010	55	M	1	2	2	1	0	1	0	0	0	0	1	0	8	8	0	0
2010	58	F	0	0	0	0	0	0	0	0	0	0	0	0	0	7	0	0
2010	39	M	1	0	2	0	0	1	0	1	0	1	1	1	8	5	0	0
2010	38	M	1	2	2	0	1	2	0	0	0	2	2	0	12	5	0	0
2010	51	M	0	0	0	0	0	0	0	0	0	0	0	0	0	6	0	0
2010	52	M	1	1	0	0	0	0	0	0	0	0	0	0	2	8	0	0
2010	53	F	0	0	0	0	0	0	0	0	0	0	0	0	0	6	0	0
2010	48	F	2	3	2	1	1	1	2	1	1	0	2	0	16	4	0	0
2010	41	M	0	0	0	0	0	0	0	0	0	0	0	0	0	5	0	0
2010	45	M	1	1	1	1	0	0	0	0	0	1	1	0	6	7	0	0
2010	52	M	0	1	0	0	0	0	0	1	0	0	2	0	4	6	1	0
2010	57	F	0	0	0	0	0	0	0	0	0	0	0	0	0	5	0	0
2010	44	F	0	0	0	0	0	0	0	0	0	0	0	0	0	6	0	0
2010	39	F	0	0	0	0	0	0	0	0	2	0	0	0	2	8	0	0
2010	57	M	1	0	1	2	0	1	2	1	1	2	1	0	12	6	0	0
2010	38	F	1	3	1	0	2	1	0	1	1	1	2	0	13	5	0	0
2010	36	M	0	2	1	0	0	0	1	2	0	0	0	0	6	7	0	0
2010	37	F	0	0	1	0	1	1	0	0	0	0	1	0	4	5	0	0
2010	60	M	0	1	0	0	0	0	0	0	0	0	1	0	2	6	0	0
2010	41	M	1	2	1	0	0	1	0	0	0	0	0	0	5	6	0	0
2010	50	M	0	1	0	0	0	0	0	0	0	0	0	0	1	7	0	0
2010	48	F	0	1	1	0	0	0	0	0	0	0	0	0	2	6	0	0
2010	44	M	0	0	0	0	0	0	0	0	0	0	0	0	0	6	0	0
2010	44	F	0	0	0	0	0	0	0	0	0	0	0	0	0	5	0	0
2010	47	M	0	0	1	0	0	0	0	0	0	0	0	0	1	7	0	0
2010	47	M	0	0	0	0	0	0	0	0	0	0	0	0	0	7	0	0
2010	36	M	0	0	0	0	0	0	0	0	0	0	0	0	0	8	0	0
2010	52	F	0	0	0	0	0	0	2	1	0	0	0	0	3	5	0	0
2010	57	M	0	1	1	0	0	0	0	0	0	0	0	0	2	7	0	0
2010	46	M	1	2	1	0	1	1	0	0	0	0	1	0	7	6	0	0
2010	45	M	0	2	0	0	0	0	2	0	0	0	0	0	4	7	0	0
2010	40	F	0	2	3	0	1	1	1	1	0	1	0	0	10	6	0	0
2010	54	F	0	2	0	0	0	0	0	0	1	0	0	0	3	6	0	0
2010	57	F	0	0	0	0	0	0	0	0	0	0	0	0	0	7	0	0
2010	57	F	0	0	0	0	0	0	0	0	0	0	0	0	0	8	0	0
2010	53	F	0	0	0	0	0	0	0	0	0	0	0	0	0	5	0	0
2010	57	M	0	0	1	1	0	1	0	0	0	0	1	0	4	7	0	0
2010	54	F	1	2	0	0	0	0	0	1	0	1	1	0	6	6	0	0
2010	60	F	0	0	2	0	1	0	0	2	0	2	4	0	11	6	0	0
2010	54	M	0	1	1	0	0	0	0	0	0	0	0	0	2	6	0	0
2010	59	F	0	1	0	0	0	0	0	0	0	0	0	0	1	6	0	0
2010	54	M	1	1	2	0	1	1	0	1	0	0	1	1	9	7	0	0
2010	47	F	0	1	0	0	0	0	0	0	0	0	0	0	1	5	0	0
2010	60	M	0	0	0	0	0	0	0	0	0	0	0	0	0	6	0	1
2010	35	M	2	0	1	0	0	1	3	2	1	3	4	3	20	7	0	0
2010	43	F	0	0	0	0	0	0	0	0	0	0	0	0	0	6	0	0
2010	44	M	3	1	1	1	0	1	2	0	0	1	0	1	11	6	0	0
2010	56	M	0	0	0	0	0	0	0	0	0	0	0	0	0	6	0	0
2010	32	F	1	2	2	0	1	2	0	2	0	2	1	0	13	6	0	0
2010	44	F	0	1	0	2	0	0	1	0	3	2	3	0	12	6	0	0
2010	45	M	0	0	0	0	0	0	0	0	0	0	0	0	0	6	0	0
2010	37	F	0	4	0	0	0	0	0	0	0	0	0	0	4	6	0	0
2010	43	F	0	1	0	0	0	1	0	0	0	0	0	0	2	6	0	0
2010	51	F	0	1	0	0	0	0	0	0	0	0	1	0	2	7	0	0
2010	46	M	1	0	0	0	1	1	0	2	0	0	0	0	5	5	0	0
2010	48	M	0	0	0	0	0	0	0	0	0	0	0	0	0	6	0	1
2010	40	F	3	1	3	0	3	3	0	0	0	2	3	0	18	6	0	0
2010	52	M	0	0	1	1	0	0	1	1	0	1	1	0	6	6	0	0
2010	51	F	0	1	0	0	0	0	0	0	0	0	0	0	1	6	0	0
2010	51	M	0	0	0	0	0	0	0	0	0	0	0	0	0	6	0	0
2010	41	F	0	0	0	0	0	0	0	0	0	0	0	0	0	5	0	0
2010	44	F	2	0	2	0	0	1	0	0	0	0	0	1	6	7	0	0
2010	56	M	0	0	0	0	0	0	0	0	0	0	0	0	0	7	0	0
2010	57	F	0	0	0	0	0	0	0	0	1	0	1	0	2	5	0	0
2010	57	M	0	0	1	0	0	1	1	0	0	1	1	0	5	6	0	0
2010	61	M	1	1	1	0	0	2	2	0	0	2	0	2	11	6	0	0
2010	62	F	0	0	0	0	0	0	0	0	0	0	0	0	0	5	0	0
2010	53	M	0	1	0	0	0	0	0	0	0	0	0	0	1	6	0	0
2010	40	F	0	0	2	0	2	0	0	2	0	0	0	0	6	8	0	0
2010	53	F	0	0	0	0	0	0	0	0	0	0	0	0	0	6	0	0
2010	52	M	0	0	3	0	2	0	0	0	0	1	4	0	10	5	0	0
2010	59	M	0	0	1	0	0	0	0	0	0	1	1	0	3	8	0	0
2010	50	F	1	0	0	1	0	1	0	0	0	0	0	0	3	7	0	0
2010	54	F	2	2	2	2	2	1	3	1	0	1	0	0	16	7	0	0
2010	56	F	0	0	0	0	0	0	0	0	0	0	2	0	2	6	0	0
2010	53	F	1	1	1	1	1	1	0	0	0	0	0	0	6	4	0	0
2010	59	M	0	0	0	0	0	0	0	0	0	0	0	0	0	7	0	0
2010	50	F	0	1	1	0	0	0	0	0	0	0	1	0	3	6	0	0
2010	60	F	0	2	1	1	0	0	0	0	0	0	1	0	5	7	0	0
2010	48	F	0	1	0	0	0	0	3	0	1	0	0	0	5	6	0	0
2010	57	M	1	2	1	2	0	0	1	0	1	1	3	2	14	6	0	0
2010	35	F	0	0	0	0	0	0	0	0	0	0	0	0	0	6	0	0
2010	37	M	0	1	0	0	0	0	0	0	0	0	0	0	1	6	0	0
2010	49	M	0	0	0	0	0	0	0	0	0	0	0	0	0	6	0	0
2010	47	F	0	2	1	0	0	0	1	0	1	1	1	0	7	6	0	0
2010	43	F	0	1	1	0	0	1	0	0	0	0	0	0	3	5	0	0
2010	51	M	0	0	1	0	0	0	2	1	0	0	2	0	6	7	0	0
2010	48	F	1	1	1	0	0	0	1	0	1	1	0	0	6	6	0	0
2010	54	M	0	2	1	0	0	0	2	1	0	1	1	0	8	7	1	0
2010	62	M	1	1	1	1	0	1	2	0	0	1	0	1	9	6	0	0
2010	56	M	1	0	0	0	0	1	1	0	0	1	0	0	4	7	0	0
2010	54	M	0	0	0	0	0	0	0	0	0	1	0	0	1	7	1	0
2010	54	M	2	0	0	0	0	2	0	0	0	2	0	0	6	8	0	0
2010	60	M	0	0	0	0	0	0	0	0	0	0	0	0	0	8	0	0
2010	54	M	1	0	0	0	0	0	0	0	0	0	0	0	1	5	0	0
2010	54	F	0	1	0	0	0	0	0	0	0	0	0	0	1	6	0	0
2010	57	F	0	0	0	0	0	0	0	0	0	0	0	0	0	7	0	0
2010	61	F	0	2	1	0	1	1	1	0	1	1	0	0	8	6	0	0
2010	44	M	0	0	0	0	0	0	0	0	0	0	0	0	0	7	0	0
2010	53	M	1	1	1	0	0	1	0	1	0	1	0	0	6	7	0	0
2010	42	M	0	0	0	0	0	0	0	0	0	0	0	0	0	5	0	0
2010	42	F	0	0	0	0	0	0	0	0	0	0	0	0	0	6	0	0
2010	45	F	0	0	3	0	0	0	0	0	0	0	0	0	3	7	0	0
2010	43	M	0	0	0	0	0	1	1	0	0	0	0	0	2	6	0	0
2010	43	F	0	0	0	0	0	0	0	0	0	0	0	0	0	5	0	0
2010	48	M	1	3	2	0	0	0	0	0	0	2	4	1	13	6	0	0
2010	46	F	0	0	0	0	0	0	0	0	0	0	0	0	0	7	0	0
2010	47	M	1	0	0	0	0	0	0	1	1	1	1	0	5	6	0	0
2010	42	M	2	1	2	0	0	1	4	2	1	3	1	0	17	6	0	0
2010	45	M	0	1	0	0	0	0	0	0	0	0	0	0	1	6	0	0
2010	41	M	0	2	0	0	0	0	0	0	0	1	3	0	6	4	0	0
2010	40	M	3	0	3	0	2	2	1	0	0	0	0	0	11	6	0	0
2010	51	M	1	1	0	0	0	0	0	0	0	0	0	0	2	6	0	0
2010	55	F	0	0	0	0	0	0	0	0	0	0	0	0	0	7	0	0
2010	35	M	1	1	1	0	0	1	0	0	0	0	0	0	4	6	0	0
2010	35	M	0	0	0	0	0	0	0	0	0	0	0	0	0	7	0	0
2010	49	F	1	1	1	1	1	1	1	0	1	0	1	0	9	7	0	0
2010	36	M	0	1	1	0	0	0	0	0	0	0	0	0	2	7	0	0
2010	37	M	1	2	2	0	0	1	2	1	1	2	1	0	13	6	0	0
2010	39	F	2	2	1	0	0	0	0	0	0	0	0	0	5	5	0	0
2010	47	F	3	0	2	0	2	2	0	0	0	0	0	0	9	7	0	0
2010	54	M	2	1	3	0	1	1	1	1	0	2	1	0	13	6	0	1
2010	55	M	0	0	0	0	0	0	0	0	0	0	0	0	0	5	0	0
2010	61	M	0	0	0	0	0	0	0	0	0	0	0	0	0	5	0	0
2010	52	F	1	1	1	0	1	0	2	1	0	0	0	1	8	6	0	0
2010	55	M	2	2	2	0	0	1	0	0	0	0	1	0	8	6	0	0
2010	51	M	0	0	0	0	0	0	0	0	0	1	0	0	1	6	0	0
2010	50	F	0	1	1	0	0	0	0	1	0	0	0	0	3	6	0	0
2010	40	M	0	0	0	0	0	0	0	0	0	0	0	0	0	7	0	0
2010	57	F	1	0	0	0	0	0	0	0	0	0	0	0	1	7	0	0
2010	44	F	0	0	0	0	0	0	0	0	0	0	0	0	0	6	0	0
2010	56	M	2	0	0	2	0	0	0	0	0	2	0	0	6	6	0	0
2010	55	F	0	1	0	0	0	0	0	1	0	0	1	0	3	7	0	0
2010	58	M	2	1	2	1	0	2	0	0	2	1	1	2	14	6	0	0
2010	62	F	2	0	2	1	0	2	1	1	0	1	1	0	11	7	0	0
2010	42	M	1	0	0	0	0	0	0	2	0	1	1	0	5	6	0	0
2010	42	M	0	1	0	0	0	0	0	1	0	1	0	0	3	6	0	0
2010	51	M	0	0	0	0	0	0	0	0	0	0	0	0	0	7	0	0
2010	48	F	0	1	0	0	0	0	0	0	0	0	0	0	1	7	0	0
2010	41	M	0	0	0	0	0	0	0	0	0	0	1	0	1	7	0	0
2010	46	M	0	0	1	0	1	0	0	0	0	0	0	0	2	6	0	0
2010	56	M	1	1	2	0	2	1	0	2	1	0	1	0	11	6	0	0
2010	54	F	0	1	0	0	1	0	0	1	0	1	1	0	5	5	0	0
2010	55	F	2	2	2	1	1	2	1	2	2	2	3	1	21	6	0	0
2010	46	F	3	0	0	0	0	0	0	0	0	3	0	0	6	6	1	0
2010	49	F	1	0	1	0	0	1	0	0	0	0	0	0	3	5	0	0
2010	53	F	0	1	0	0	0	0	1	0	0	0	0	0	2	7	0	0
2010	49	M	0	0	1	0	0	0	0	0	0	0	0	0	1	6	0	0
2010	53	F	3	2	2	0	1	2	1	2	0	0	0	0	13	7	0	0
2010	59	F	0	1	1	0	0	0	0	0	0	0	0	0	2	6	0	0
2010	48	F	0	1	2	0	1	0	0	0	0	1	1	0	6	7	0	0
2010	39	F	0	0	0	0	0	0	0	0	0	0	0	0	0	6	0	0
2010	44	M	1	2	1	0	1	0	1	1	0	1	1	1	10	5	0	0
2010	39	M	0	0	0	0	0	0	0	0	0	0	0	0	0	7	0	0
2010	52	F	1	1	1	0	0	0	0	0	0	0	0	0	3	6	0	0
2010	40	M	0	0	0	0	0	0	0	0	0	0	0	0	0	6	0	0
2010	60	M	0	0	0	0	0	0	0	0	0	0	0	0	0	7	0	0
2010	58	F	0	0	0	0	0	0	0	0	0	0	0	0	0	6	0	0
2010	44	M	0	1	0	0	0	0	1	0	0	1	1	0	4	6	0	0
2010	50	M	1	1	1	0	0	1	0	1	0	1	1	0	7	8	0	0
2010	48	M	1	1	0	0	0	0	1	0	0	0	0	0	3	6	0	0
2010	55	F	0	0	0	0	0	0	0	0	0	0	0	0	0	7	0	0
2010	51	M	0	0	0	0	0	0	0	0	0	0	0	0	0	5	0	0
2010	44	M	1	0	1	0	1	1	0	0	0	1	3	0	8	6	0	0
2010	42	F	0	0	1	0	1	0	2	1	0	1	2	0	8	6	0	0
2010	48	M	0	2	0	0	0	0	0	0	0	0	0	0	2	7	0	0
2010	47	M	0	0	0	0	0	0	0	0	0	0	0	0	0	6	0	0
2010	44	M	1	1	1	0	0	1	1	1	1	1	1	0	9	6	0	0
2010	44	M	0	0	0	0	0	0	0	0	0	0	0	0	0	7	0	0
2010	32	M	0	0	0	0	0	1	0	0	0	0	0	1	2	8	0	0
2010	53	F	0	1	0	0	0	0	0	0	0	0	1	0	2	7	0	0
2010	42	M	0	0	0	0	0	0	0	0	0	0	0	0	0	5	0	0
2010	52	F	0	0	1	0	0	1	0	0	0	0	0	0	2	5	0	0
2010	44	M	0	1	0	1	1	1	1	0	0	2	1	1	9	5	0	0
2010	43	M	2	2	2	0	1	2	3	0	0	1	2	0	15	5	0	0
2010	32	F	0	0	0	0	1	0	1	0	0	0	0	0	2	5	0	0
2010	62	M	0	0	0	0	0	0	0	0	0	0	0	0	0	6	0	0
2010	51	M	0	0	0	0	0	0	0	0	0	1	0	0	1	6	0	0
2010	50	F	2	1	2	0	0	0	0	2	0	2	2	0	11	6	0	0
2010	60	F	0	1	0	0	0	0	0	1	0	1	0	0	3	6	0	0
2010	59	M	0	1	0	0	0	0	0	0	0	0	1	0	2	5	0	0
2010	62	M	0	0	0	0	0	0	1	0	0	0	0	0	1	5	0	1
2010	59	F	0	0	1	0	0	0	0	0	0	0	2	0	3	7	0	0
2010	46	M	2	1	0	0	0	0	0	2	0	1	0	0	6	7	0	0
2010	39	F	0	0	0	0	0	0	0	0	0	0	0	0	0	7	0	0
2010	39	M	2	2	2	0	1	1	2	1	0	2	1	0	14	7	0	0
2010	44	M	0	0	0	0	0	0	0	0	0	0	0	0	0	6	0	0
2010	53	F	0	0	0	0	0	0	0	0	0	0	0	0	0	6	0	0
2010	56	F	1	0	2	0	0	1	0	1	0	0	1	0	6	7	0	0
2010	41	F	0	1	0	1	0	0	0	1	0	0	0	0	3	7	0	0
2010	37	M	0	0	0	0	0	0	0	0	0	0	0	0	0	6	0	0
2010	44	F	0	1	1	1	0	0	0	0	0	0	0	0	3	6	0	0
2010	62	M	1	0	0	0	0	1	0	0	0	0	0	0	2	8	0	0
2010	33	M	1	0	1	0	1	0	0	0	0	1	0	0	4	5	0	0
2010	52	M	0	0	0	0	0	0	0	0	0	0	0	0	0	8	0	0
2010	45	F	0	1	0	0	0	0	0	0	0	0	0	0	1	6	0	0
2010	40	F	0	1	2	1	0	0	1	1	0	0	0	0	6	6	0	0
2010	38	F	0	1	0	0	0	0	0	0	0	0	0	0	1	6	0	0
2010	50	M	2	0	0	0	0	2	0	0	0	0	0	0	4	7	0	0
2010	50	F	1	2	1	0	0	0	0	0	0	0	0	0	4	4	0	0
2010	48	M	0	2	2	2	0	0	1	1	1	1	0	0	10	7	0	0
2010	40	M	0	1	0	0	0	0	0	1	1	0	0	0	3	4	0	0
2010	41	M	1	0	1	0	0	1	0	0	0	1	0	0	4	5	0	0
2010	48	M	0	1	0	0	0	0	0	0	1	0	0	0	2	6	0	0
2010	45	F	1	1	0	0	0	0	0	0	0	0	0	0	2	6	0	0
2010	50	F	1	1	1	0	0	0	1	0	0	0	0	0	4	5	0	1
2010	57	F	0	1	0	0	0	0	0	0	0	0	0	0	1	6	0	0
2010	52	M	0	0	0	0	0	0	0	0	0	0	1	0	1	5	0	0
2010	52	F	0	2	1	0	0	1	0	0	1	0	0	0	5	5	0	0
2010	59	M	1	1	3	0	0	0	0	2	1	1	0	0	9	6	0	0
2010	51	M	0	2	0	1	0	0	0	1	0	1	2	0	7	6	0	0
2010	50	M	0	0	0	0	0	0	0	0	0	0	0	0	0	5	0	0
2010	49	F	0	0	0	0	0	0	0	0	0	0	0	0	0	7	0	0
2010	61	F	0	0	0	0	0	0	0	0	0	0	0	0	0	7	0	0
2010	53	M	2	1	1	0	0	1	0	0	0	0	0	0	5	7	0	0
2010	53	M	2	1	2	0	1	2	1	1	1	2	2	1	16	6	0	0
2010	49	M	0	0	1	1	0	0	0	0	0	1	1	0	4	6	0	0
2010	50	M	0	0	0	0	0	0	0	0	0	0	0	0	0	7	0	0
2010	51	F	0	2	1	0	2	0	0	2	0	0	0	0	7	6	0	0
2010	46	F	0	0	0	0	0	0	0	0	0	0	0	0	0	5	0	0
2010	53	M	0	0	0	0	0	0	0	0	0	0	0	0	0	5	0	0
2010	50	M	1	1	1	0	0	1	1	1	0	0	0	0	6	6	0	0
2010	42	M	0	0	0	0	0	0	0	0	0	0	0	0	0	7	0	0
2010	60	M	2	2	3	0	2	2	0	2	0	1	3	0	17	7	0	0
2010	54	M	0	0	0	0	0	0	0	0	0	0	0	0	0	7	0	0
2010	42	M	4	3	2	4	1	2	0	0	0	2	3	1	22	6	0	0
2010	51	M	0	2	2	0	0	0	0	0	0	0	0	0	4	9	0	0
2010	47	F	0	0	0	0	0	0	0	0	0	0	0	0	0	4	0	0
2010	54	F	2	1	4	0	0	1	0	0	0	0	0	0	8	6	0	0
2010	56	M	2	2	2	0	0	0	0	0	0	2	2	0	10	6	0	0
2010	52	M	0	1	1	0	0	0	0	0	0	0	0	0	2	6	0	0
2010	44	F	0	1	0	0	0	1	1	2	0	1	2	1	9	7	0	0
2010	55	F	1	1	1	1	0	1	0	0	0	1	1	1	8	6	0	0
2010	55	F	0	0	0	0	0	0	0	0	0	0	0	0	0	7	0	0
2010	54	F	0	0	1	0	0	0	0	2	2	0	0	0	5	6	0	0
2010	45	F	0	0	0	0	0	0	0	0	0	0	0	0	0	5	0	0
2010	41	M	2	0	0	0	0	0	0	0	0	0	0	0	2	7	0	0
2010	41	M	2	2	2	0	1	2	3	3	1	1	2	0	19	7	0	0
2010	49	M	2	1	2	0	0	2	1	0	1	2	1	1	13	5	0	1
2010	47	M	0	3	1	0	0	1	1	0	0	0	1	0	7	5	0	0
2010	39	F	2	1	2	0	1	2	0	1	0	0	0	0	9	7	0	0
2010	41	F	1	1	3	1	1	2	0	0	0	1	0	0	10	6	0	0
2010	37	F	0	0	1	0	0	0	0	0	0	0	0	0	1	5	0	0
2010	37	F	0	0	0	0	0	0	2	0	0	0	0	0	2	6	0	0
2010	53	F	0	1	0	0	0	0	0	0	0	1	0	0	2	6	0	0
2010	41	F	0	0	0	0	0	0	0	0	0	0	0	0	0	6	0	0
2010	57	M	0	0	0	0	0	0	0	0	0	0	0	0	0	6	0	0
2010	35	M	0	0	1	0	0	0	0	0	0	1	1	0	3	6	0	0
2010	61	M	2	1	0	0	0	0	0	0	1	1	1	0	6	6	0	0
2010	37	M	0	2	0	0	0	0	0	0	0	0	0	0	2	5	0	0
2010	38	F	0	0	0	0	0	0	0	0	0	0	0	0	0	5	0	0
2010	48	M	2	0	0	0	0	2	0	0	0	0	0	0	4	8	0	0
2010	61	M	0	0	0	0	1	0	1	0	0	1	0	0	3	7	0	0
2010	61	M	0	0	0	0	0	0	0	0	0	0	0	0	0	8	0	0
2010	55	M	0	0	0	0	0	0	0	0	0	0	0	0	0	6	0	0
2010	63	M	1	2	1	0	1	1	2	0	0	1	2	0	11	6	0	0
2010	65	M	0	0	0	1	0	0	0	0	0	0	0	0	1	7	0	0
2010	62	F	0	0	0	0	0	0	0	0	0	0	0	0	0	7	0	0
2010	59	M	2	3	0	0	0	0	0	0	0	1	1	0	7	6	0	0
2010	57	M	2	0	1	0	0	2	0	0	0	1	2	0	8	7	0	0
2010	44	M	1	0	1	0	0	1	0	0	0	1	0	0	4	8	1	0
2010	60	M	3	2	3	0	0	3	0	0	0	1	1	1	14	8	0	0
2010	54	M	0	0	0	0	0	0	0	0	0	0	0	0	0	8	0	0
2010	56	M	0	0	0	0	0	0	0	0	0	0	0	0	0	7	0	0
2010	45	M	1	1	1	0	0	1	0	0	0	1	3	0	8	6	0	0
2010	59	F	2	1	2	1	2	2	0	1	0	1	1	1	14	6	0	0
2010	42	M	0	1	0	0	0	1	1	0	0	0	2	0	5	8	0	0
2010	48	M	1	0	0	0	0	0	0	0	0	1	1	0	3	5	0	0
2010	45	F	1	1	0	0	0	0	0	0	0	0	0	0	2	7	0	0
2010	40	F	1	1	1	0	1	1	0	0	0	0	0	0	5	8	0	0
2010	53	M	0	3	2	0	0	0	0	0	0	0	0	0	5	5	0	0
2010	53	F	0	0	0	0	0	0	0	0	0	1	2	0	3	7	0	0
2010	51	F	0	0	0	0	0	0	0	0	0	0	0	0	0	6	0	0
2010	61	M	0	1	1	0	0	1	0	1	0	0	0	0	4	5	0	0
2010	31	M	3	4	4	3	3	3	3	3	3	3	3	4	39	4	0	0
2010	45	M	1	2	0	0	0	0	0	0	0	0	0	0	3	6	0	0
2010	50	M	0	0	0	0	0	0	0	0	0	0	0	0	0	6	0	0
2010	49	F	0	0	0	0	0	0	1	1	0	0	1	1	4	5	0	0
2010	39	F	1	3	1	0	1	0	0	0	0	1	0	0	7	5	0	0
2010	38	M	0	2	0	0	0	0	2	2	0	0	0	0	6	8	0	0
2010	44	M	0	0	0	0	1	0	0	0	0	0	0	0	1	6	0	0
2010	49	M	1	2	2	0	0	1	0	0	0	1	0	0	7	6	0	0
2010	49	M	0	1	0	0	0	0	0	0	0	0	1	0	2	5	0	0
2010	50	F	0	0	0	0	0	0	0	0	2	0	0	0	2	4	0	0
2010	66	F	1	0	0	0	0	0	0	0	0	0	1	0	2	7	0	0
2010	62	F	0	0	0	0	0	0	0	1	0	0	1	0	2	6	0	0
2010	55	F	1	2	3	2	1	1	0	1	1	1	3	2	18	6	0	0
2010	42	M	2	0	0	0	0	2	0	0	0	0	2	0	6	7	0	0
2010	45	M	1	2	2	1	1	1	1	0	0	2	1	0	12	7	0	0
2010	52	F	0	0	0	0	0	0	4	2	0	0	2	0	8	8	0	0
2010	46	M	1	1	1	0	0	1	0	0	0	0	0	0	4	8	0	0
2010	56	M	0	0	0	0	0	0	0	0	0	0	0	0	0	6	0	0
2010	52	F	1	0	0	0	0	1	0	0	0	0	0	0	2	7	0	0
2010	60	M	0	0	0	0	0	0	0	0	0	0	0	0	0	7	0	1
2010	49	F	0	2	0	0	0	0	0	0	0	0	0	0	2	7	0	0
2010	54	M	0	0	1	0	0	0	0	0	0	1	0	0	2	7	0	0
2010	45	M	0	0	0	0	0	1	0	1	0	1	0	0	3	6	0	0
2010	42	F	0	0	2	0	2	1	0	0	0	2	2	0	9	7	0	0
2010	55	M	0	0	0	0	0	0	0	0	0	0	1	0	1	7	0	0
2010	63	F	2	0	0	0	0	2	1	1	0	0	0	0	6	7	0	0
2010	60	F	0	2	0	0	0	0	0	0	0	0	0	0	2	5	0	0
2010	61	M	1	0	1	0	0	0	1	0	1	1	1	0	6	7	0	0
2010	36	M	0	0	0	0	0	0	0	1	0	0	0	0	1	6	0	0
2010	54	M	0	0	0	0	0	0	1	0	0	0	0	0	1	8	0	0
2010	62	M	0	0	0	0	0	0	0	0	0	2	2	0	4	6	0	0
2010	37	M	0	0	0	0	0	0	0	0	1	1	1	0	3	7	0	0
2010	69	M	0	0	0	0	0	0	0	0	0	0	0	0	0	6	0	0
2010	43	M	1	2	2	1	1	1	3	1	1	2	1	1	17	6	0	0
2010	43	F	0	0	0	0	0	0	0	0	0	0	0	0	0	8	0	0
2010	54	M	0	0	0	0	0	0	0	0	0	0	0	0	0	7	0	0
2010	36	F	1	1	1	0	0	1	1	1	0	0	0	1	7	7	0	0
2010	42	F	2	0	2	1	0	0	0	0	0	0	0	0	5	7	0	0
2010	50	F	0	0	0	0	0	0	0	0	0	0	2	0	2	6	0	0
2010	44	F	0	2	0	0	0	0	1	0	0	0	0	0	3	7	0	0
2010	59	F	0	0	0	0	0	0	0	0	0	0	0	0	0	6	0	0
2010	36	F	1	1	1	0	1	1	0	1	0	0	0	0	6	7	0	0
2010	54	F	1	2	1	1	0	1	0	0	0	0	1	0	7	5	0	0
2010	40	F	0	0	2	0	0	0	0	0	0	0	0	0	2	6	0	0
2010	41	F	1	3	1	1	0	1	1	1	0	1	0	0	10	6	0	0
2010	40	F	1	1	0	0	0	0	0	0	0	0	0	0	2	7	0	0
2010	35	F	0	0	0	0	0	0	0	0	0	0	0	0	0	7	0	0
2010	60	M	0	0	0	0	0	0	0	0	0	0	0	0	0	9	1	0
2010	62	M	0	1	0	0	0	1	0	0	0	0	1	0	3	5	0	0
2010	61	F	3	2	1	1	0	1	0	0	0	0	0	0	8	6	0	0
2010	54	M	1	0	0	0	1	0	1	0	1	0	0	0	4	7	0	0
2010	57	M	0	0	0	0	0	0	0	0	0	0	0	0	0	6	0	0
2010	58	F	2	1	0	0	0	1	0	0	0	0	0	0	4	6	0	0
2010	56	F	2	4	2	1	2	2	2	0	0	2	2	1	20	6	0	0
2010	57	M	0	1	0	0	0	0	0	1	0	0	0	1	3	6	0	0
2010	45	M	1	2	1	0	0	0	2	0	0	1	0	0	7	6	0	0
2010	45	M	1	1	0	0	0	0	2	1	0	1	0	0	6	7	0	0
2010	61	F	1	3	2	1	1	1	1	0	1	1	1	1	14	6	0	0
2010	52	M	1	1	1	0	0	0	1	0	2	3	3	2	14	6	1	0
2010	36	F	0	0	0	0	0	0	0	0	0	0	0	0	0	7	0	0
2010	37	M	0	0	0	0	0	0	0	0	0	0	0	0	0	3	0	0
2010	53	F	0	1	0	0	0	0	0	0	0	0	0	0	1	6	0	0
2010	42	M	0	1	0	0	0	0	2	1	0	0	0	0	4	5	0	0
2010	52	M	0	0	0	0	0	0	0	0	0	0	0	0	0	6	0	0
2010	56	M	0	2	0	0	0	1	0	0	0	0	1	0	4	6	0	0
2010	36	M	0	0	0	0	0	0	0	0	0	0	0	0	0	7	0	0
2010	57	M	0	0	0	0	0	0	0	0	0	0	1	0	1	7	0	0
2010	55	F	0	0	2	0	0	0	0	0	0	0	3	0	5	6	0	0
2010	38	F	1	0	1	0	0	0	0	1	1	0	0	0	4	7	0	0
2010	41	F	0	0	0	0	0	0	0	0	0	0	0	0	0	6	0	0
2010	40	M	0	0	0	0	0	0	0	0	0	1	0	0	1	7	0	0
2010	39	M	0	0	0	0	0	0	0	0	0	0	0	0	0	4	0	0
2010	67	F	0	0	0	0	0	0	1	0	0	0	0	0	1	7	0	0
2010	69	M	0	0	0	0	0	0	0	0	0	0	0	0	0	7	0	0
2010	45	F	0	0	0	0	0	0	0	0	0	0	0	0	0	6	0	0
2010	64	F	0	0	1	0	0	0	0	0	0	0	0	0	1	5	0	0
2010	67	M	1	1	1	0	0	1	0	0	0	1	1	0	6	7	0	1
2010	56	M	0	0	0	0	0	0	4	2	0	0	0	0	6	6	0	0
2010	57	M	0	0	0	0	0	0	0	0	0	0	0	0	0	6	0	0
2010	54	F	0	1	1	0	0	0	0	0	0	0	1	0	3	7	0	0
2010	60	M	1	0	0	0	0	1	0	0	0	0	0	0	2	7	0	0
2010	44	M	0	0	0	0	0	0	0	0	0	1	1	0	2	6	0	0
2010	54	M	1	1	0	0	0	1	0	0	1	1	3	0	8	7	0	0
2010	48	M	0	0	0	0	0	0	0	0	0	0	0	0	0	7	0	0
2010	59	F	0	0	0	0	0	0	0	0	0	0	0	0	0	6	0	0
2010	45	M	0	0	0	0	0	0	0	0	0	1	1	0	2	6	0	0
2010	48	F	1	2	2	0	0	1	1	0	1	1	0	0	9	6	0	0
2010	54	M	0	0	0	0	0	0	0	0	0	0	0	0	0	6	0	0
2010	50	M	1	0	0	0	0	1	0	0	0	0	0	0	2	6	0	0
2010	44	M	2	2	2	0	1	2	3	0	1	2	1	1	17	6	0	0
2010	47	F	0	2	1	0	0	0	0	0	0	1	0	1	5	6	0	0
2010	50	M	0	0	0	0	0	0	0	0	0	0	0	0	0	6	0	0
2010	38	M	0	0	0	0	0	0	0	0	0	0	0	0	0	7	0	0
2010	49	M	0	0	0	0	0	0	0	0	0	0	0	0	0	6	0	0
2010	53	M	1	0	1	0	0	0	0	1	0	0	2	0	5	6	0	0
2010	50	F	0	2	1	1	0	0	1	0	0	0	1	0	6	6	0	0
2010	60	M	2	1	1	0	0	1	0	0	0	0	1	0	6	7	0	0
2010	62	F	1	1	0	0	0	1	0	0	0	1	0	0	4	5	0	0
2010	48	M	0	0	0	0	0	0	0	0	0	0	0	0	0	7	0	0
2010	38	M	0	0	0	0	0	0	0	0	0	0	0	0	0	7	0	0
2010	39	F	0	1	0	0	0	0	0	0	1	0	0	0	2	6	0	0
2010	39	F	0	0	0	0	1	0	0	1	0	1	0	0	3	5	0	0
2010	51	F	0	2	0	0	0	0	0	0	0	0	0	0	2	6	0	0
2010	46	F	1	3	1	0	0	1	0	0	0	0	0	0	6	6	0	0
2010	39	M	0	0	0	0	0	0	0	0	0	0	0	0	0	7	0	0
2010	52	M	1	1	1	1	0	1	0	1	0	2	1	1	10	5	0	1
2010	36	M	2	2	2	0	0	1	1	0	0	1	1	1	11	5	0	0
2010	43	F	1	1	0	0	0	0	0	0	0	0	0	0	2	7	0	0
2010	45	F	0	2	0	0	0	0	0	0	0	0	0	0	2	6	0	0
2010	59	M	0	0	0	0	0	0	1	0	0	0	0	0	1	7	0	0
2010	49	F	0	0	0	0	0	0	0	0	0	0	0	0	0	6	0	0
2010	39	F	0	1	1	0	0	0	0	0	0	0	1	0	3	7	0	0
2010	56	M	0	0	0	0	0	0	0	0	0	0	0	0	0	6	0	0
2010	40	F	0	2	0	0	0	0	0	0	0	0	0	0	2	6	0	0
2010	50	F	1	1	1	0	0	1	0	0	0	0	0	0	4	6	0	0
2010	54	M	0	2	1	0	0	0	0	1	0	0	1	0	5	7	0	0
2010	44	F	0	0	0	0	0	0	0	0	0	0	1	0	1	7	0	0
2010	43	M	0	2	0	0	0	0	0	0	0	0	0	0	2	6	0	0
2010	40	F	0	1	1	0	0	0	0	0	0	0	0	0	2	6	0	0
2010	55	F	0	0	0	0	0	0	0	0	0	0	0	0	0	7	0	0
2010	55	M	1	2	2	0	0	1	1	0	1	1	1	0	10	5	0	0
2010	36	M	0	0	1	0	0	0	0	0	0	0	0	0	1	7	0	0
2010	55	M	0	0	0	0	0	0	0	0	1	0	1	0	2	7	0	0
2010	61	M	0	0	0	0	0	0	0	0	0	0	0	0	0	7	0	0
2010	54	M	0	2	0	0	0	0	3	0	0	0	0	0	5	6	0	0
2010	60	M	0	0	0	0	0	0	0	0	0	0	0	0	0	6	0	0
2010	54	M	0	0	0	0	0	0	0	0	0	0	0	0	0	6	0	0
2010	54	M	1	0	1	0	0	0	0	0	0	0	0	0	2	8	0	0
2010	49	M	2	0	0	0	1	1	0	0	0	1	0	0	5	6	0	0
2010	52	M	0	0	0	0	0	0	0	0	0	1	0	0	1	6	0	0
2010	58	M	3	0	1	0	0	0	0	0	0	2	0	1	7	6	0	0
2010	58	M	0	1	1	0	0	0	0	0	0	0	1	0	3	6	0	0
2010	39	F	0	3	1	0	0	0	0	0	0	0	0	0	4	4	0	0
2010	69	M	1	0	0	0	0	1	3	0	0	1	2	0	8	6	0	1
2010	49	F	0	2	0	0	0	0	0	0	0	0	0	0	2	8	0	0
2010	49	F	0	1	1	0	0	1	0	0	0	0	0	0	3	6	0	1
2010	47	F	1	3	0	0	0	0	0	0	0	0	2	2	8	6	0	0
2010	36	M	0	2	1	0	0	0	0	0	0	0	0	0	3	6	0	0
2010	44	M	2	2	1	0	1	2	1	0	1	1	1	0	12	6	0	0
2010	34	M	0	1	0	0	0	0	0	0	1	0	1	0	3	7	0	0
2010	44	M	1	1	2	1	1	1	2	1	1	0	2	0	13	5	0	0
2010	35	M	0	0	0	0	0	0	0	0	0	0	0	0	0	6	0	0
2010	36	F	0	0	1	0	0	0	0	0	0	0	0	0	1	7	0	0
2010	35	M	0	0	0	0	0	0	0	0	0	0	0	0	0	7	0	0
2010	36	M	0	0	0	0	0	0	0	1	1	0	0	0	2	8	0	0
2010	35	M	0	2	1	0	0	0	0	1	1	0	1	0	6	5	0	0
2010	32	F	0	0	0	0	0	0	0	0	0	0	0	0	0	6	0	0
2010	41	F	0	1	0	0	0	0	0	0	1	0	0	0	2	7	0	0
2010	45	F	0	1	0	0	0	1	1	0	0	0	0	0	3	6	0	0
2010	43	F	0	0	0	0	0	0	0	0	0	0	0	0	0	7	0	0
2010	59	M	0	0	0	0	0	0	0	1	0	1	0	0	2	6	1	0
2010	58	M	0	0	0	0	0	0	0	0	0	1	0	0	1	6	0	0
2010	59	M	0	0	0	0	0	0	0	0	0	0	0	0	0	5	0	0
2010	56	M	0	0	0	0	0	0	1	0	0	1	0	0	2	7	0	0
2010	53	F	1	2	2	0	2	2	2	0	0	1	1	0	13	6	0	0
2010	56	M	1	0	0	0	0	0	1	0	0	1	0	0	3	8	0	0
2010	57	F	2	1	1	0	1	1	1	1	0	1	0	0	9	6	0	0
2010	54	F	0	2	0	0	0	0	0	0	0	0	0	0	2	6	0	0
2010	54	F	0	3	0	0	0	0	0	0	0	1	1	0	5	7	0	0
2010	57	F	0	0	0	0	0	0	0	0	0	0	0	0	0	7	0	0
2010	54	F	0	0	0	0	0	0	0	0	1	0	0	0	1	4	0	0
2010	52	F	0	0	0	0	0	0	0	0	0	0	0	0	0	6	0	0
2010	51	F	1	0	1	0	1	1	0	0	0	0	1	0	5	7	0	0
2010	50	M	0	0	0	0	0	0	2	1	0	1	0	0	4	7	0	0
2010	49	M	1	0	0	0	0	0	0	0	0	0	0	0	1	5	0	0
2010	60	M	0	0	0	0	0	0	0	0	0	0	0	0	0	5	0	0
2010	60	F	2	2	2	2	1	1	0	1	0	1	0	0	12	6	0	0
2010	47	F	0	2	1	0	0	0	0	2	0	0	0	0	5	7	0	0
2010	51	M	0	0	0	0	0	0	0	0	0	2	0	0	2	8	0	0
2010	52	F	0	0	0	0	0	0	0	0	0	0	3	0	3	6	0	0
2010	54	F	0	1	1	0	0	0	2	0	0	0	0	0	4	7	0	0
2010	54	M	1	0	2	0	0	1	3	0	0	0	0	0	7	6	0	0
2010	48	M	0	1	0	0	0	1	1	1	0	1	1	0	6	6	0	0
2010	62	M	1	2	0	0	0	1	0	0	0	0	0	0	4	7	0	0
2010	56	M	2	4	2	3	1	1	4	0	4	0	1	0	22	6	0	0
2010	43	M	0	2	1	1	1	1	0	1	0	1	1	0	9	7	0	0
2010	37	F	0	2	0	0	1	1	0	0	0	0	0	0	4	7	0	0
2010	38	M	0	0	1	0	0	0	0	0	0	0	1	0	2	6	0	0
2010	39	M	0	3	0	0	0	0	0	0	0	0	1	0	4	6	0	0
2010	57	M	0	1	0	0	0	0	0	0	0	0	0	0	1	4	0	0
2010	43	M	0	1	0	0	0	0	0	1	0	0	0	0	2	4	0	0
2010	45	M	0	0	0	0	0	0	0	0	0	0	0	0	0	7	0	0
2010	59	F	1	0	1	0	0	0	0	0	0	1	0	0	3	7	0	0
2010	50	M	0	0	1	0	0	1	0	0	0	1	0	0	3	8	0	0
2010	44	F	0	0	0	0	0	0	0	0	0	0	0	0	0	6	0	0
2010	34	F	1	3	2	2	1	1	0	3	0	1	2	0	16	6	0	0
2010	40	M	0	0	0	0	0	0	0	0	0	0	0	0	0	4	0	0
2010	52	M	1	0	1	1	0	1	0	1	0	1	1	1	8	8	0	0
2010	46	M	0	3	0	0	0	0	0	0	0	0	0	0	3	6	0	0
2010	39	F	0	2	0	0	0	0	1	1	0	0	0	0	4	5	0	0
2010	58	M	1	1	2	2	0	1	1	0	1	1	0	0	10	7	0	0
2010	59	F	2	2	3	2	1	1	4	1	2	2	2	2	24	5	0	0
2010	45	M	2	2	1	0	0	1	0	0	0	0	2	0	8	6	0	0
2010	39	M	2	1	1	0	0	1	0	0	0	1	1	0	7	5	0	0
2010	39	M	0	0	0	0	0	0	0	0	0	0	0	0	0	6	0	0
2010	39	M	0	0	0	0	0	0	0	0	0	0	1	0	1	7	0	0
2010	40	F	0	1	1	1	1	0	2	1	1	0	1	1	10	6	0	0
2010	39	M	0	0	0	0	0	0	1	1	0	1	0	0	3	7	0	0
2010	39	F	0	2	1	2	1	1	1	1	0	0	0	0	9	6	0	0
2010	37	M	1	0	0	0	0	0	0	0	0	0	0	0	1	6	0	0
2010	38	M	0	0	0	0	0	0	0	0	0	0	0	0	0	6	0	0
2010	40	F	0	0	2	0	0	0	0	0	0	0	0	0	2	6	0	0
2010	49	M	0	0	0	0	0	0	0	0	0	1	0	0	1	6	0	0
2010	33	F	0	0	0	0	0	0	0	0	0	0	0	0	0	7	0	0
2010	38	F	2	1	0	0	1	3	0	0	0	1	2	0	10	4	0	0
2010	53	F	0	0	0	0	0	0	0	0	0	0	0	0	0	7	0	0
2010	55	M	0	0	0	0	0	0	3	0	2	0	0	0	5	6	0	0
2010	57	M	0	0	0	0	0	0	0	0	0	0	0	0	0	7	0	0
2010	41	M	0	0	0	0	0	0	0	0	1	0	0	0	1	6	0	0
2010	38	M	3	3	2	0	2	2	0	0	0	3	0	0	15	7	0	0
2010	39	M	0	3	2	0	0	0	1	3	0	0	1	0	10	6	0	0
2010	59	M	0	0	0	0	0	0	0	0	0	0	0	0	0	7	0	0
2010	56	M	0	0	0	0	0	0	0	0	0	0	0	0	0	8	0	0
2010	56	F	1	1	0	0	0	0	2	1	1	0	1	0	7	7	0	0
2010	56	F	0	0	0	0	0	0	0	0	0	0	0	0	0	6	1	0
2010	54	F	0	1	1	0	0	1	1	0	1	0	2	0	7	5	0	0
2010	51	F	0	0	0	0	0	0	0	0	0	0	0	0	0	7	0	0
2010	52	M	0	0	0	1	0	0	3	1	1	0	2	0	8	7	0	0
2010	49	F	0	1	1	0	0	0	1	0	0	0	0	0	3	5	0	0
2010	46	M	0	1	1	0	0	1	0	0	0	0	1	0	4	5	0	0
2010	49	F	0	0	1	0	1	1	2	0	0	0	1	1	7	6	0	0
2010	42	M	0	1	1	0	1	0	0	0	0	0	2	0	5	6	0	0
2010	42	F	0	2	0	0	0	0	0	0	0	0	0	0	2	7	0	0
2010	45	F	0	0	0	0	0	0	0	0	0	0	0	0	0	6	0	0
2010	43	M	0	0	0	0	0	0	0	0	0	0	0	0	0	7	0	0
2010	41	M	0	0	0	0	0	0	0	0	0	0	0	0	0	6	0	0
2010	48	M	0	0	0	0	0	0	0	0	0	0	0	0	0	6	0	0
2010	42	M	1	0	0	0	0	1	0	0	0	0	0	0	2	5	0	0
2010	57	F	2	3	0	0	1	1	1	0	0	0	0	0	8	7	0	0
2010	57	M	0	1	0	0	0	0	0	0	0	0	0	0	1	6	0	0
2010	37	F	0	2	1	0	1	0	0	1	0	1	0	1	7	6	0	0
2010	60	M	0	1	1	1	0	1	0	0	0	1	2	0	7	6	0	0
2010	61	M	3	2	2	1	0	0	0	0	0	2	3	0	13	7	0	0
2010	82	M	0	0	0	0	0	0	0	0	0	0	0	0	0	7	0	0
2010	60	M	0	0	0	0	0	0	0	0	0	0	0	0	0	7	0	0
2010	53	F	2	1	1	0	0	1	0	1	0	0	0	0	6	5	0	0
2010	43	F	1	1	1	1	1	1	1	0	1	1	0	0	9	8	0	0
2010	58	M	0	0	0	0	0	0	0	0	0	0	0	0	0	6	0	0
2010	40	M	0	1	1	0	0	0	0	2	0	0	1	0	5	5	0	0
2010	60	F	2	0	0	0	0	0	0	0	0	0	0	0	2	5	0	0
2010	49	M	2	0	2	0	0	2	0	0	0	2	2	0	10	6	0	1
2010	33	F	0	2	1	0	0	0	0	3	0	1	1	0	8	5	0	0
2010	60	M	0	0	0	0	2	0	0	0	0	0	0	0	2	7	0	0
2010	54	M	1	1	1	0	0	0	1	2	1	1	2	0	10	5	0	0
2010	37	F	0	0	0	0	0	0	0	0	0	0	0	0	0	6	0	0
2010	54	M	0	1	0	0	0	0	0	1	0	0	1	0	3	6	0	0
2010	49	M	2	1	1	0	1	1	0	1	2	0	0	1	10	6	0	0
2010	49	F	0	0	0	0	0	0	0	0	0	0	0	0	0	6	0	0
2010	41	F	1	2	1	0	1	0	2	2	0	0	0	0	9	7	0	0
2010	43	M	0	0	1	0	0	0	0	0	0	0	2	0	3	4	0	0
2010	35	M	0	0	0	0	0	0	0	0	0	0	0	0	0	5	0	0
2010	52	F	0	2	2	0	0	0	0	2	1	0	0	0	7	7	0	0
2010	61	M	0	0	0	0	0	0	2	0	0	0	2	0	4	6	0	0
2010	48	M	1	1	1	0	1	1	0	0	0	1	0	1	7	5	0	0
2010	35	M	0	0	0	0	1	0	0	0	0	0	0	0	1	7	0	0
2010	62	M	1	1	1	0	1	0	0	0	0	1	0	0	5	8	0	0
2010	43	F	0	0	0	0	0	0	0	2	0	2	0	0	4	8	0	0
2010	64	M	1	1	0	0	0	0	0	0	0	0	0	0	2	6	0	0
2010	46	M	0	0	0	0	0	0	2	0	0	1	0	0	3	6	0	0
2010	33	M	1	0	2	0	0	1	1	0	1	1	1	0	8	7	0	0
2010	62	M	0	0	0	0	0	0	1	0	0	0	0	0	1	7	0	0
2010	37	F	0	2	0	0	0	0	0	1	0	0	0	0	3	6	0	0
2010	28	F	1	1	1	0	1	1	0	1	0	0	1	0	7	6	0	0
2010	54	F	0	0	1	0	0	1	2	0	0	0	0	0	4	5	0	0
2010	43	F	0	0	0	0	0	0	0	0	0	0	0	0	0	6	0	0
2010	59	F	0	0	2	0	0	0	0	0	0	0	0	0	2	6	0	0
2010	54	M	1	0	1	0	0	1	0	1	0	0	0	0	4	6	0	0
2010	62	M	0	0	0	0	0	0	0	0	0	0	0	0	0	7	0	0
2010	60	F	1	0	0	0	0	0	0	1	0	0	0	0	2	7	0	0
2010	58	F	0	0	0	0	0	0	0	0	0	0	0	0	0	6	0	0
2010	58	M	1	1	0	0	0	0	0	0	0	1	0	1	4	6	1	0
2010	60	M	0	0	0	0	0	0	0	0	0	0	0	0	0	7	0	0
2010	57	M	0	0	1	0	0	1	0	0	1	0	2	0	5	6	0	0
2010	61	F	0	0	0	0	0	0	0	0	0	0	0	0	0	8	0	0
2010	57	F	3	2	0	0	0	2	0	0	0	2	2	2	13	6	0	0
2010	54	F	0	4	1	1	0	0	1	1	2	2	3	1	16	5	0	0
2010	51	F	1	0	0	0	0	1	0	0	0	0	0	0	2	6	0	0
2010	60	M	2	2	2	0	0	0	0	1	0	0	0	0	7	8	0	1
2010	60	M	2	2	2	1	1	2	1	0	1	1	1	1	15	6	0	0
2010	47	M	0	0	0	0	0	0	0	0	0	0	2	0	2	6	0	0
2010	58	M	0	0	0	0	0	0	0	0	0	0	0	0	0	6	0	0
2010	52	F	0	1	1	1	0	0	4	2	0	2	1	1	13	6	0	0
2010	62	M	0	0	0	0	0	0	0	0	0	2	0	0	2	5	0	0
2010	60	F	0	0	0	0	0	0	0	0	0	0	0	0	0	6	0	0
2010	39	F	0	1	0	0	0	0	1	0	0	2	0	0	4	7	0	0
2010	44	M	0	0	0	0	0	0	0	0	0	0	0	0	0	7	0	0
2010	39	M	3	3	2	3	1	3	0	1	0	2	3	0	21	6	0	0
2010	50	M	0	0	0	0	0	0	1	0	0	0	0	0	1	7	0	0
2010	52	M	1	0	1	0	1	0	0	0	0	1	1	0	5	6	0	0
2010	55	M	3	1	1	0	1	2	0	0	0	2	3	3	16	7	0	0
2010	55	M	0	0	0	0	0	1	0	1	0	0	0	0	2	8	0	0
2010	48	F	2	1	3	0	0	2	2	0	2	0	2	0	14	6	0	0
2010	49	F	2	4	4	0	0	2	0	1	0	3	1	0	17	5	0	0
2010	47	M	1	1	1	0	1	1	0	1	0	1	1	1	9	6	0	0
2010	43	M	0	2	0	0	0	0	0	0	0	0	0	0	2	7	0	0
2010	45	F	0	0	0	0	0	0	0	0	0	0	1	0	1	5	0	0
2010	39	F	0	0	0	0	0	0	0	1	0	0	0	0	1	5	0	0
2010	45	F	1	3	3	0	1	0	0	0	0	1	2	1	12	5	0	0
2010	51	M	0	0	0	0	0	0	0	2	0	0	0	0	2	8	0	0
2010	41	F	0	0	2	0	0	0	0	0	0	0	0	0	2	7	0	0
2010	51	M	0	0	0	0	0	0	0	0	0	0	0	0	0	5	0	0
2010	52	F	2	2	1	0	0	1	0	0	2	2	2	1	13	5	0	0
2010	38	F	0	4	3	0	0	0	0	2	0	0	2	0	11	8	0	0
2010	59	M	0	0	0	0	0	0	1	0	0	1	0	0	2	6	0	1
2010	43	M	0	0	0	0	0	0	0	0	0	0	2	0	2	6	0	0
2010	45	M	1	1	1	0	0	0	0	0	1	1	0	0	5	6	0	0
2010	41	M	0	0	0	0	0	0	0	0	0	0	0	0	0	5	0	0
2010	34	M	3	0	0	0	0	1	1	1	0	3	0	0	9	7	0	0
2010	48	M	1	0	1	0	0	0	0	0	0	0	0	0	2	7	0	0
2010	70	M	2	2	2	0	0	2	0	0	0	0	2	0	10	9	0	0
2010	52	F	0	1	1	0	0	0	0	1	0	0	0	0	3	6	0	0
2010	65	M	0	0	0	0	0	0	0	0	0	0	0	0	0	6	0	0
2010	64	F	1	1	1	1	0	1	0	1	0	0	0	0	6	6	0	0
2010	56	M	0	1	1	0	0	0	0	0	0	0	2	0	4	7	0	0
2010	57	M	2	0	0	0	0	0	0	0	0	2	0	2	6	8	0	0
2010	55	M	0	0	0	0	0	0	0	0	0	0	0	0	0	7	0	0
2010	50	M	1	1	0	1	0	0	0	1	0	0	1	0	5	7	0	0
2010	59	M	2	2	0	1	1	2	0	1	1	1	2	0	13	5	0	0
2010	42	M	0	0	0	0	0	0	0	0	0	0	2	0	2	7	0	0
2010	51	F	1	0	0	0	0	0	0	0	1	0	1	0	3	8	0	0
2010	42	F	0	0	2	0	0	0	0	0	0	0	0	0	2	5	0	0
2010	37	F	0	0	0	0	0	0	0	0	0	0	0	0	0	7	0	0
2010	42	F	3	4	2	1	1	3	4	0	1	2	2	2	25	6	0	0
2010	62	F	0	0	0	0	0	0	0	0	0	0	0	0	0	7	0	0
2010	62	F	0	0	0	0	0	0	0	0	0	0	0	0	0	8	0	0
2010	52	M	0	0	0	0	0	0	0	0	0	0	0	0	0	8	0	0
2010	51	F	0	0	0	0	0	0	0	2	0	0	0	1	3	8	0	0
2010	38	M	2	2	2	0	1	1	1	1	0	0	2	0	12	6	0	0
2010	67	M	1	2	1	0	0	0	2	0	1	1	0	0	8	6	0	0
2010	47	F	1	1	0	0	0	0	1	0	0	1	0	0	4	6	0	0
2010	39	M	0	0	0	0	0	0	1	0	0	2	2	0	5	5	0	0
2010	49	M	0	1	1	0	0	0	0	0	0	1	1	0	4	6	0	0
2010	50	F	1	2	1	0	0	1	0	1	0	0	0	1	7	6	0	0
2010	53	F	1	0	1	1	1	1	0	1	1	0	1	0	8	6	0	0
2010	43	M	2	1	2	1	1	1	1	0	0	2	0	1	12	6	0	0
2010	53	M	1	1	0	0	0	1	0	0	0	0	0	0	3	6	0	0
2010	61	F	3	1	2	0	0	2	0	0	0	2	0	2	12	7	0	0
2010	62	M	2	1	2	0	0	2	1	0	0	1	4	0	13	8	0	0
2010	37	F	0	0	0	0	0	0	0	0	0	0	0	0	0	5	0	0
2010	42	F	0	0	3	0	2	1	0	2	0	0	0	0	8	8	0	0
2010	45	F	0	0	0	0	0	0	0	0	0	0	0	0	0	5	0	0
2010	40	M	0	0	2	0	2	0	0	3	0	0	1	0	8	7	0	0
2010	53	F	1	2	1	0	0	0	0	0	0	1	2	0	7	6	0	0
2010	49	F	0	2	1	0	0	0	0	0	0	0	0	0	3	5	0	0
2010	62	F	0	0	1	0	0	0	0	0	0	0	0	0	1	7	0	0
2010	47	M	0	0	0	0	0	0	0	0	0	0	1	0	1	6	0	0
2010	59	F	1	0	0	0	0	0	0	0	0	1	2	0	4	7	0	0
2010	60	F	1	0	0	0	0	0	0	0	1	0	0	0	2	6	0	0
2010	57	F	2	1	2	2	1	2	0	1	0	1	0	0	12	5	0	0
2010	56	M	0	0	0	0	0	1	0	0	0	0	1	0	2	7	0	0
2010	35	F	0	0	1	0	0	0	1	0	0	0	0	0	2	6	0	0
2010	66	M	0	0	0	0	0	0	1	0	0	0	2	0	3	6	1	0
2010	63	M	2	2	2	0	0	2	0	0	0	0	0	2	10	7	0	0
2010	58	M	1	1	0	0	0	0	0	0	0	0	1	0	3	6	0	0
2010	75	F	0	0	0	0	0	0	1	1	0	0	0	0	2	7	0	0
2010	57	M	0	0	0	0	0	0	0	0	0	0	0	0	0	7	0	0
2010	58	M	2	0	0	0	0	0	0	0	0	0	0	1	3	6	0	0
2010	65	M	2	1	1	0	0	2	0	0	0	0	0	0	6	8	1	0
2010	53	F	1	1	0	0	0	0	0	0	0	0	0	0	2	6	0	0
2010	56	M	0	0	0	0	0	0	0	0	0	0	0	0	0	10	0	0
2010	48	M	1	0	0	0	0	0	0	0	0	0	4	0	5	6	0	0
2010	45	M	1	2	0	1	0	0	0	0	0	0	0	0	4	6	0	0
2010	60	M	0	0	0	0	0	0	0	0	0	0	0	0	0	7	0	0
2010	47	M	1	1	1	0	0	0	0	0	0	1	1	0	5	7	0	0
2010	52	M	0	0	0	0	0	0	0	0	0	0	1	0	1	6	0	0
2010	46	F	1	0	2	1	0	1	0	1	0	0	0	1	7	6	0	0
2010	42	M	0	0	0	0	0	0	0	0	0	0	4	0	4	6	0	0
2010	71	M	0	0	0	0	0	0	0	0	0	0	0	0	0	8	0	0
2010	63	M	1	0	1	0	0	1	0	0	0	0	0	0	3	8	0	0
2010	60	F	1	1	0	0	0	0	0	0	0	0	1	0	3	7	0	0
2010	40	F	0	1	1	0	0	1	0	1	0	1	0	0	5	5	0	0
2010	59	M	0	0	0	0	0	0	0	0	0	0	0	0	0	7	0	0
2010	44	M	2	0	0	0	0	2	0	0	0	0	0	0	4	6	0	0
2010	52	F	0	1	0	0	0	0	0	0	0	0	0	0	1	7	0	0
2010	42	M	2	1	2	0	0	2	0	0	0	0	1	1	9	6	0	0
2010	39	F	2	2	1	0	0	1	0	1	0	0	1	1	9	5	0	0
2010	41	F	0	2	0	0	0	0	0	1	0	0	0	0	3	7	0	0
2010	54	F	0	2	3	0	0	0	0	0	0	0	0	0	5	5	0	0
2010	40	F	0	1	1	0	0	0	0	0	0	0	0	0	2	7	0	0
2010	40	F	0	0	0	0	0	0	0	0	0	0	2	0	2	8	0	0
2010	63	F	2	0	1	0	1	2	3	0	0	1	0	2	12	5	0	0
2010	45	M	0	1	0	0	0	0	0	0	0	0	0	0	1	4	0	0
2010	44	F	1	0	1	0	1	0	2	1	0	0	0	0	6	7	0	0
2010	43	M	1	1	0	0	0	0	0	0	0	1	1	0	4	6	0	0
2010	54	M	0	1	0	0	0	0	0	0	0	0	0	0	1	5	0	1
2010	60	M	0	0	0	0	0	0	0	0	0	0	0	0	0	7	0	0
2010	46	M	1	0	0	0	0	0	0	0	0	0	0	0	1	5	0	0
2010	48	F	0	1	0	0	0	0	0	0	0	0	0	0	1	6	0	0
2010	58	M	0	0	1	1	0	0	0	0	2	0	0	0	4	6	0	0
2010	52	F	2	1	0	0	1	2	1	1	0	1	0	0	9	6	0	0
2010	45	M	2	1	2	2	0	2	1	1	1	1	3	1	17	6	0	0
2010	53	M	0	0	0	0	0	0	2	0	0	0	0	0	2	8	0	0
2010	53	F	1	0	1	0	0	1	2	1	0	0	1	0	7	6	0	0
2010	35	F	0	3	0	0	0	0	0	0	0	0	0	0	3	7	0	0
2010	31	M	0	1	1	0	0	0	0	0	0	0	0	0	2	7	0	0
2010	46	M	0	0	0	0	0	0	0	0	0	0	0	0	0	6	0	0
2010	50	M	3	3	0	0	0	3	3	0	0	2	0	2	16	6	0	0
2010	35	F	2	2	2	2	1	2	3	3	1	0	3	0	21	6	0	1
2010	51	F	0	1	0	0	0	0	0	1	0	1	1	1	5	7	0	0
2010	52	M	0	2	0	0	0	0	2	0	0	1	1	0	6	7	0	0
2010	59	M	0	1	1	0	0	0	0	0	0	0	2	0	4	7	0	0
2010	36	M	0	2	1	0	0	0	0	0	0	0	0	0	3	6	0	0
2010	39	F	0	1	1	0	0	0	0	0	0	0	0	0	2	5	0	1
2010	39	M	0	0	0	0	0	0	0	0	0	0	0	0	0	6	0	0
2010	40	F	0	0	1	0	0	0	0	0	0	0	0	0	1	6	0	0
2010	41	F	1	1	0	0	0	0	0	0	0	1	1	0	4	6	0	0
2010	52	M	0	1	0	0	0	0	0	0	0	1	0	0	2	7	0	1
2010	30	M	3	0	0	0	1	1	1	0	0	0	1	0	7	5	0	0
2010	55	M	0	3	0	0	0	0	1	0	1	1	1	0	7	6	0	0
2010	35	M	3	2	3	0	0	0	0	0	2	2	4	0	16	6	0	0
2010	46	F	0	0	0	0	0	0	0	0	0	0	0	0	0	6	0	0
2010	69	M	1	0	0	0	0	0	0	0	0	0	0	0	1	9	0	0
2010	64	F	2	0	2	0	0	2	0	0	1	1	0	0	8	7	0	0
2010	60	F	4	0	4	2	2	2	0	1	3	0	0	0	18	6	1	0
2010	67	F	0	0	0	0	0	0	0	0	0	0	0	0	0	5	0	0
2010	55	M	0	0	0	0	0	0	0	0	0	0	1	0	1	5	0	0
2010	60	F	2	2	1	0	0	1	0	1	0	2	1	0	10	6	0	0
2010	54	M	1	0	1	0	0	1	0	0	0	1	0	0	4	8	0	0
2010	57	F	0	1	2	0	1	1	0	0	0	1	1	1	8	6	0	0
2010	56	M	0	0	0	0	0	0	0	0	0	0	0	0	0	7	0	0
2010	56	M	1	0	1	0	0	0	0	0	0	0	1	0	3	6	0	0
2010	53	M	1	1	0	0	0	0	1	0	0	1	0	0	4	5	0	0
2010	56	M	1	1	0	0	0	1	0	0	0	0	0	0	3	5	0	0
2010	53	M	1	2	1	1	1	1	1	1	0	2	2	1	14	6	0	0
2010	62	M	2	3	2	1	1	2	0	0	0	1	1	1	14	7	0	0
2010	47	F	0	3	0	1	2	0	0	2	3	2	1	0	14	6	0	0
2010	59	M	2	2	0	0	0	0	0	0	0	0	2	0	6	7	0	0
2010	53	F	0	3	3	0	3	1	0	3	0	1	0	0	14	6	0	0
2010	54	M	0	0	0	0	0	0	0	0	0	0	0	0	0	7	0	0
2010	60	M	0	0	0	0	0	0	0	0	0	0	0	0	0	8	0	0
2010	52	M	0	0	0	0	1	0	0	0	0	0	0	0	1	6	0	0
2010	46	M	0	0	0	0	0	0	0	0	0	0	0	0	0	7	0	0
2010	47	F	0	0	0	0	0	0	0	0	0	0	0	0	0	7	0	0
2010	52	M	0	2	0	0	0	0	0	0	0	0	1	0	3	5	0	0
2010	42	F	1	1	0	0	0	1	1	1	0	0	0	0	5	6	0	0
2010	43	M	0	0	1	0	0	0	0	0	0	0	0	0	1	7	0	0
2010	44	M	0	0	1	0	0	0	0	0	0	1	0	0	2	5	0	0
2010	74	M	0	0	1	0	1	0	2	0	0	1	0	0	5	6	0	0
2010	57	F	0	0	0	0	0	0	0	1	0	0	1	0	2	7	0	0
2010	59	F	0	0	0	0	0	0	0	0	0	0	0	0	0	7	0	0
2010	62	M	1	2	1	0	0	1	0	0	0	1	3	0	9	6	0	0
2010	39	F	2	3	2	2	2	2	2	2	0	3	2	2	24	6	0	0
2010	62	M	0	0	0	0	0	0	0	0	0	0	0	0	0	5	0	0
2010	62	F	0	0	0	0	0	0	0	0	0	0	0	0	0	7	0	0
2010	46	F	0	0	0	0	0	0	0	0	0	0	0	0	0	6	0	0
2010	44	F	0	0	0	0	0	0	0	1	0	0	0	0	1	6	0	0
2010	49	M	0	1	0	0	0	0	0	0	0	0	0	0	1	6	0	0
2010	43	M	0	1	0	0	0	0	1	0	0	1	1	0	4	6	0	0
2010	44	M	3	2	2	0	0	3	0	0	0	0	0	0	10	6	0	0
2010	53	F	0	0	0	0	0	0	0	0	0	0	0	0	0	7	0	0
2010	69	M	0	0	0	0	0	0	2	0	2	1	0	0	5	7	0	0
2010	50	M	0	3	1	0	0	1	0	1	0	1	3	0	10	6	0	0
2010	47	M	1	1	1	1	0	1	0	0	0	0	0	0	5	6	0	0
2010	66	M	0	0	0	0	0	0	0	0	0	0	0	0	0	8	0	0
2010	48	M	0	0	0	0	0	0	0	0	0	0	0	0	0	8	0	0
2010	62	F	2	2	0	0	0	0	0	0	0	1	0	0	5	6	0	0
2010	54	M	0	1	1	0	1	0	0	0	0	1	3	0	7	7	0	0
2010	59	M	0	1	1	0	0	1	1	0	0	0	2	0	6	7	0	0
2010	59	M	0	0	0	1	0	0	0	0	0	0	0	0	1	8	0	0
2010	63	M	0	0	0	0	0	0	0	0	0	0	0	0	0	7	0	0
2010	56	M	0	0	0	0	0	0	0	2	0	0	0	0	2	5	0	0
2010	56	M	0	0	1	0	1	1	1	2	1	1	4	0	12	5	0	0
2010	59	M	0	0	0	0	0	0	0	0	0	0	0	0	0	6	0	0
2010	66	M	0	0	0	0	0	0	0	0	0	0	0	1	1	8	0	0
2010	47	F	0	0	0	0	0	0	0	0	0	0	0	1	1	6	0	0
2010	37	M	0	0	0	0	0	0	0	0	0	0	0	0	0	7	0	0
2010	47	M	0	2	1	0	0	0	0	1	0	0	0	0	4	7	0	0
2010	52	M	0	0	1	0	0	0	0	0	0	1	1	0	3	7	0	0
2010	40	F	0	0	1	0	0	0	0	1	0	0	0	0	2	6	0	0
2010	36	F	0	0	0	0	0	0	0	2	0	0	0	0	2	7	0	0
2010	62	M	0	0	0	0	0	0	0	0	0	0	0	0	0	7	0	0
2010	52	F	0	0	0	0	0	0	0	0	0	0	0	0	0	6	0	0
2010	40	F	1	2	1	0	1	1	1	2	0	0	1	0	10	5	0	0
2010	46	F	0	2	2	0	2	0	0	0	0	0	0	0	6	6	0	0
2010	37	M	1	1	1	0	0	0	0	0	0	0	1	0	4	7	0	0
2010	48	M	2	0	0	0	0	1	0	0	0	0	0	0	3	6	0	0
2010	56	M	0	0	0	0	0	0	1	0	0	0	0	0	1	6	0	0
2010	51	F	2	2	2	0	1	2	0	1	1	1	1	1	14	6	0	0
2010	48	F	0	3	2	1	1	1	0	2	0	4	3	0	17	6	1	0
2010	31	F	1	0	0	0	1	0	0	0	0	0	1	0	3	5	0	0
2010	49	M	0	0	3	2	1	0	0	0	0	1	0	0	7	6	0	0
2010	43	M	0	1	0	0	0	0	2	1	0	1	0	0	5	6	0	0
2010	30	F	0	1	1	0	0	0	0	0	0	0	0	0	2	7	0	0
2010	35	M	0	1	1	0	0	0	0	0	0	0	0	0	2	6	0	1
2010	46	F	1	1	1	0	0	1	0	0	0	1	0	0	5	7	0	0
2010	42	M	2	2	2	0	0	2	0	0	0	0	0	0	8	4	0	0
2010	35	M	0	0	0	0	0	0	0	0	0	0	0	0	0	5	0	0
2010	55	F	0	0	0	0	0	0	0	0	0	0	0	0	0	8	0	0
2010	61	F	2	2	2	2	2	3	0	0	0	0	4	0	17	7	0	0
2010	42	F	4	2	1	1	0	1	0	0	0	0	3	3	15	7	0	0
2010	59	M	0	2	0	1	0	0	0	0	0	1	1	1	6	5	0	0
2010	57	M	0	0	0	0	0	0	0	0	0	0	0	0	0	6	0	0
2010	53	F	1	3	1	0	1	1	1	2	1	2	1	0	14	5	0	0
2010	57	M	0	2	0	0	0	0	1	0	0	0	1	0	4	7	0	0
2010	58	M	0	0	0	0	0	0	0	0	0	0	0	0	0	8	0	0
2010	57	F	3	3	2	2	1	1	0	1	1	1	0	0	15	5	0	0
2010	55	M	2	1	2	0	0	2	0	0	0	1	2	0	10	7	0	0
2010	61	M	0	1	0	1	0	0	0	0	0	1	0	0	3	7	0	0
2010	61	M	2	2	2	1	0	1	1	1	0	0	1	0	11	7	0	0
2010	62	F	0	0	0	0	0	0	0	0	0	0	0	0	0	7	0	0
2010	55	F	0	0	0	0	0	2	0	2	2	0	0	0	6	6	0	0
2010	55	M	2	0	0	0	0	0	0	0	0	0	0	0	2	6	1	0
2010	54	F	0	0	0	0	0	0	0	0	0	0	0	0	0	5	0	0
2010	55	F	2	1	1	1	0	2	0	1	0	1	1	0	10	6	0	0
2010	50	F	1	3	3	1	1	1	0	0	0	0	0	1	11	6	0	0
2010	54	M	4	1	1	0	0	1	4	0	0	0	0	0	11	6	0	0
2010	56	M	2	1	0	0	0	1	1	1	1	2	2	1	12	8	0	0
2010	69	M	0	1	1	0	1	1	0	0	0	2	0	0	6	7	0	0
2010	52	M	0	2	1	0	0	1	0	0	0	0	0	0	4	7	0	0
2010	53	F	0	1	0	0	0	0	0	0	0	0	0	0	1	6	0	0
2010	53	M	2	2	2	1	2	2	3	3	3	3	2	0	25	6	0	0
2010	56	M	0	1	1	1	1	1	0	2	0	1	0	1	9	8	0	0
2010	45	F	2	2	3	0	2	2	0	2	0	0	1	2	16	6	0	0
2010	54	M	0	0	0	0	0	0	0	0	0	0	0	0	0	6	0	0
2010	60	M	0	0	0	0	0	0	0	0	0	0	0	0	0	6	0	0
2010	58	M	0	0	0	0	0	0	0	0	0	0	0	0	0	6	0	0
2010	42	M	0	0	0	1	0	0	0	0	1	0	0	0	2	6	0	0
2010	63	M	0	0	0	1	0	0	0	0	0	0	0	0	1	7	0	0
2010	54	M	2	2	2	1	0	1	0	1	0	1	1	0	11	8	0	0
2010	37	M	0	1	0	0	0	0	0	0	0	0	0	0	1	8	0	0
2010	37	M	0	0	0	0	0	0	0	0	0	0	0	0	0	5	0	0
2010	37	M	0	1	2	0	0	0	0	1	0	0	0	0	4	7	0	0
2010	35	M	0	0	0	0	0	0	0	0	0	0	2	0	2	7	0	0
2010	59	F	0	0	0	0	0	0	0	0	0	0	1	1	2	5	0	0
2010	47	F	0	0	0	0	0	0	0	0	0	0	0	0	0	5	0	0
2010	50	M	0	0	0	0	0	0	0	0	0	0	0	0	0	6	0	0
2010	56	M	1	1	0	1	0	1	0	0	0	0	1	0	5	6	0	0
2010	41	M	1	1	2	0	1	1	1	0	0	1	3	0	11	6	1	0
2010	52	M	1	2	1	0	1	1	3	2	1	1	1	1	15	6	0	0
2010	47	M	0	0	1	0	0	0	0	0	0	0	0	0	1	6	0	0
2010	50	M	0	0	0	0	0	0	0	0	0	1	1	0	2	8	0	0
2010	41	F	1	0	1	0	0	1	0	0	0	0	0	0	3	6	0	0
2010	49	F	2	1	1	0	0	1	0	0	0	1	1	0	7	5	0	0
2010	53	M	0	0	0	0	0	0	0	0	0	0	0	0	0	7	0	0
2010	59	M	0	0	0	0	0	1	0	0	0	1	1	1	4	8	0	0
2010	52	M	0	2	0	0	0	0	0	0	0	0	0	0	2	6	0	0
2010	65	M	0	0	0	0	0	1	2	0	0	0	0	0	3	7	0	0
2010	42	F	0	0	0	0	0	0	0	0	0	0	0	0	0	6	0	0
2010	63	F	0	1	0	2	0	0	0	0	1	0	1	0	5	6	0	0
2010	40	F	0	0	2	0	1	0	0	0	0	0	1	0	4	8	0	0
2010	58	M	0	0	0	0	0	0	0	0	0	0	0	0	0	8	0	0
2010	51	M	1	0	0	0	0	1	0	0	0	0	0	0	2	6	0	0
2010	43	F	2	3	1	2	0	0	3	0	3	3	1	0	18	6	0	1
2010	53	F	1	1	3	0	2	1	1	0	0	1	0	0	10	5	0	0
2010	33	M	0	0	0	0	0	0	0	0	0	0	0	0	0	5	0	0
2010	53	M	3	2	0	3	0	2	1	0	3	2	2	3	21	6	0	1
2010	50	M	0	1	0	1	0	0	0	1	0	0	0	0	3	7	0	0
2010	59	M	0	0	0	0	0	0	0	0	0	0	0	0	0	6	0	0
2010	32	M	0	0	0	0	0	0	0	0	0	0	0	0	0	6	0	0
2010	43	M	0	0	0	0	0	0	0	0	0	0	0	0	0	6	0	0
2010	36	F	0	0	0	0	0	0	0	0	0	0	0	0	0	8	0	0
2010	37	F	1	1	0	0	0	0	1	0	0	0	1	0	4	7	0	0
2010	55	F	0	0	0	0	0	0	0	0	0	0	0	0	0	6	0	0
2010	50	M	1	2	1	0	0	1	0	0	0	1	2	0	8	6	0	0
2010	55	M	0	0	0	0	0	0	0	0	0	0	0	0	0	7	0	0
2010	47	F	2	2	2	0	1	2	1	0	1	2	2	0	15	5	0	0
2010	66	M	0	0	0	0	0	0	0	0	0	0	0	0	0	6	0	1
2010	41	M	0	0	0	0	0	0	0	0	0	0	0	0	0	7	0	0
2010	55	M	1	1	0	0	0	1	0	1	0	0	1	0	5	6	0	0
2010	55	M	1	2	2	1	0	1	1	2	2	2	1	1	16	4	0	0
2010	55	M	0	0	0	0	0	0	0	0	0	0	3	0	3	6	0	0
2010	53	F	0	1	0	0	0	0	0	0	0	0	1	0	2	6	0	0
2010	55	M	0	0	0	0	0	0	0	0	0	0	0	0	0	7	0	0
2010	58	M	1	0	0	0	0	0	0	0	0	1	1	0	3	8	0	1
2010	52	F	0	0	1	0	0	0	0	0	2	1	0	1	5	4	0	0
2010	65	M	2	2	0	0	0	1	0	0	0	1	1	0	7	7	0	0
2010	49	F	0	0	0	0	0	0	0	0	0	0	1	0	1	6	0	0
2010	49	M	0	1	0	0	0	0	0	0	0	0	1	0	2	6	0	0
2010	48	F	0	0	0	0	0	1	0	0	0	1	1	0	3	6	0	0
2010	49	F	1	2	1	0	0	0	0	0	0	0	0	0	4	6	0	0
2010	48	M	0	1	1	0	0	0	0	0	0	0	0	0	2	6	0	0
2010	46	M	0	0	0	0	0	0	0	0	0	0	0	0	0	5	0	0
2010	46	M	0	0	0	0	0	0	0	0	0	0	0	0	0	7	0	0
2010	50	M	0	1	1	0	1	1	1	0	1	1	0	0	7	6	0	0
2010	45	M	1	0	0	0	0	0	0	0	0	1	0	0	2	7	0	0
2010	42	M	1	0	0	0	0	1	0	0	0	0	0	0	2	6	0	0
2010	45	M	0	3	1	0	1	1	1	0	0	1	1	0	9	5	0	0
2010	38	M	0	0	0	0	0	0	1	0	0	0	0	0	1	7	0	0
2010	44	F	0	0	0	0	0	0	0	0	0	0	0	0	0	6	0	0
2010	39	M	0	3	0	0	0	0	1	0	0	0	1	0	5	6	0	0
2010	51	M	0	1	0	0	0	0	0	1	0	1	1	0	4	6	0	0
2010	38	M	1	1	0	0	0	0	0	1	0	0	1	0	4	6	0	0
2010	43	F	0	2	2	3	0	3	0	0	0	0	0	0	10	5	0	0
2010	39	M	0	0	1	0	0	0	3	0	0	0	3	0	7	8	0	0
2010	43	F	0	0	1	0	0	0	0	0	0	0	0	0	1	5	0	0
2010	44	F	1	2	2	0	1	1	0	1	2	1	1	0	12	6	0	0
2010	47	M	0	0	0	0	0	0	0	0	0	0	0	0	0	6	0	0
2010	48	F	1	2	2	0	2	1	2	1	0	0	0	0	11	6	0	0
2010	40	F	1	1	0	0	0	0	1	1	0	1	1	0	6	6	0	0
2010	51	F	1	1	1	0	0	1	1	0	0	0	0	0	5	6	0	0
2010	41	F	0	4	0	0	0	0	2	0	0	0	0	0	6	6	0	1
2010	48	M	0	0	0	0	0	0	3	0	0	3	0	0	6	6	0	0
2010	34	M	2	3	4	0	1	2	2	0	0	1	1	1	17	7	0	0
2010	36	M	0	1	0	0	0	0	0	0	0	1	2	0	4	7	0	0
2010	31	M	0	0	0	0	0	0	0	0	0	0	0	0	0	7	0	0
2010	40	M	0	0	0	0	0	0	0	0	0	0	0	0	0	8	0	0
2010	44	F	0	3	2	0	0	0	0	0	0	0	0	0	5	6	0	0
2010	55	F	2	0	0	0	0	2	0	0	0	1	1	0	6	6	0	0
2010	57	M	2	2	2	0	0	2	0	0	2	0	2	0	12	7	0	1
2010	54	F	0	0	0	0	0	0	0	4	0	0	0	0	4	5	0	0
2010	39	F	2	2	2	1	1	2	0	0	0	0	0	0	10	8	0	0
2010	39	F	0	0	0	0	0	0	0	0	0	0	0	0	0	5	0	0
2010	40	F	1	3	4	1	1	2	0	2	0	1	1	2	18	5	0	0
2010	56	M	0	0	0	0	0	0	0	0	0	0	0	0	0	8	0	0
2010	44	F	0	2	1	0	0	0	0	0	0	0	0	0	3	6	0	0
2010	35	M	0	0	0	0	0	0	0	0	0	0	1	0	1	7	0	0
2010	35	M	0	0	0	0	0	0	1	0	0	0	0	0	1	6	0	0
2010	56	M	1	2	1	0	0	1	0	0	2	2	1	1	11	8	0	0
2010	47	M	2	1	1	1	0	1	1	0	0	1	0	0	8	7	0	0
2010	59	M	1	0	0	0	0	0	2	0	0	0	0	0	3	7	0	0
2010	55	M	0	0	0	0	0	0	0	0	0	0	0	0	0	6	0	0
2010	54	F	1	1	1	0	0	1	0	0	0	0	0	0	4	6	0	0
2010	57	F	0	3	0	0	0	0	0	2	0	0	0	0	5	6	0	0
2010	40	M	1	1	2	0	1	1	4	3	0	2	2	0	17	7	0	0
2010	55	F	2	1	3	1	0	3	0	0	0	2	1	2	15	7	0	0
2010	58	M	1	0	0	0	0	1	0	0	0	0	0	0	2	8	0	0
2010	50	F	0	0	0	0	0	0	0	0	0	0	0	0	0	6	0	0
2010	55	M	0	0	0	0	0	0	0	0	0	0	0	0	0	6	0	0
2010	46	M	0	1	0	1	0	0	1	0	0	1	0	0	4	6	0	0
2010	48	M	3	4	2	0	0	1	0	0	0	0	3	2	15	6	0	1
2010	43	F	2	1	2	0	1	2	0	2	0	0	0	0	10	7	0	0
2010	59	M	0	0	0	0	0	0	0	0	0	0	0	0	0	7	0	0
2010	74	F	0	0	0	0	0	0	0	0	0	0	0	0	0	9	0	0
2010	75	M	0	0	0	0	0	0	0	0	1	0	0	0	1	7	0	0
2010	35	M	1	0	0	0	0	0	0	0	0	2	0	0	3	5	0	0
2010	57	M	1	2	2	0	1	1	1	1	0	0	0	0	9	7	0	0
2010	45	M	0	0	0	0	0	0	0	0	0	0	0	0	0	5	0	0
2010	62	F	1	0	1	0	0	0	0	0	0	0	0	0	2	6	0	0
2010	57	M	2	0	1	0	0	2	1	0	0	2	3	1	12	7	0	0
2010	49	M	0	0	0	0	0	0	0	0	0	0	2	0	2	6	0	0
2010	50	M	0	0	0	0	0	0	0	0	0	0	0	0	0	7	0	0
2010	53	F	1	3	2	0	0	2	0	0	0	1	0	1	10	7	0	0
2010	52	M	0	3	3	0	0	0	0	0	0	0	0	0	6	6	0	0
2010	55	M	1	2	1	0	0	1	0	1	0	0	0	0	6	7	0	0
2010	50	M	2	2	0	0	0	2	2	0	0	3	0	1	12	5	0	0
2010	58	M	0	1	0	0	0	0	0	0	0	0	0	0	1	7	0	0
2010	44	M	1	0	0	0	0	0	0	0	0	1	0	0	2	7	0	0
2010	50	M	0	0	0	0	0	0	0	0	0	0	3	0	3	6	0	0
2010	47	F	0	0	0	0	0	0	0	0	0	0	0	0	0	7	0	0
2010	59	M	0	0	0	0	0	0	0	0	0	0	0	0	0	6	0	0
2010	34	M	0	0	0	0	0	0	0	0	0	0	0	0	0	6	0	0
2010	73	M	0	0	0	0	0	0	2	1	0	1	1	0	5	6	1	0
2010	38	M	1	0	1	0	0	1	0	0	0	1	1	0	5	6	0	0
2010	62	F	1	0	2	0	0	0	0	0	0	0	0	0	3	6	0	0
2010	60	M	0	0	0	0	0	0	0	0	0	0	0	0	0	6	0	0
2010	46	M	0	2	1	0	0	0	2	0	0	0	2	0	7	6	0	0
2010	48	F	0	1	1	1	0	0	0	0	0	0	1	0	4	4	0	0
2010	33	M	0	0	0	0	0	0	0	0	0	0	1	0	1	6	0	0
2010	59	M	0	0	0	0	0	0	1	0	0	1	0	0	2	6	0	0
2010	57	M	0	0	2	0	0	0	0	0	0	0	0	0	2	7	0	0
2010	51	M	0	0	0	0	0	2	0	0	0	1	0	0	3	7	0	0
2010	61	M	0	0	0	0	0	0	0	0	0	0	0	0	0	8	0	0
2010	50	M	1	0	1	0	0	0	0	1	0	1	0	0	4	7	0	0
2010	52	F	3	3	3	2	1	3	1	0	2	3	2	3	26	4	1	0
2010	45	M	1	1	1	0	0	1	0	1	0	0	0	0	5	6	0	0
2010	45	M	2	0	1	0	1	1	1	1	1	1	1	0	10	5	0	0
2010	65	M	0	0	0	3	3	0	0	0	0	0	0	0	6	7	0	0
2010	64	F	0	1	2	0	0	0	0	0	0	0	0	0	3	7	0	0
2010	55	M	0	0	0	0	0	0	0	0	0	0	0	0	0	8	0	0
2010	61	F	0	1	0	0	0	0	0	0	0	0	0	0	1	6	0	0
2010	66	M	0	0	0	0	0	0	0	0	0	0	0	0	0	6	0	0
2010	45	F	3	3	3	3	3	3	2	3	0	0	1	0	24	5	0	0
2010	49	F	0	0	1	0	0	0	0	2	0	0	0	0	3	5	0	0
2010	50	M	1	2	3	0	0	0	0	1	1	1	1	0	10	4	0	0
2010	61	M	0	0	0	0	0	0	0	0	0	0	0	0	0	7	0	0
2010	27	M	0	0	0	0	0	0	0	0	0	0	0	0	0	4	0	0
2010	39	F	2	0	1	0	0	0	1	0	0	0	0	0	4	6	0	0
2010	41	F	1	2	2	1	0	1	0	0	0	0	0	0	7	7	0	0
2010	38	M	0	0	0	0	0	0	0	0	0	0	1	0	1	5	0	0
2010	55	M	0	1	0	0	0	0	0	0	0	0	0	0	1	6	0	0
2010	48	M	0	1	1	0	0	0	0	0	0	1	0	0	3	5	0	0
2010	41	F	0	2	2	0	0	0	0	1	0	0	1	0	6	6	0	0
2010	41	F	0	0	0	0	0	0	0	0	0	0	0	0	0	6	0	0
2010	42	M	0	3	1	0	0	0	0	0	0	1	2	0	7	5	0	0
2010	44	F	0	0	0	0	0	0	0	0	0	0	0	0	0	5	0	0
2010	44	M	0	0	1	0	0	0	0	0	0	0	0	0	1	5	0	0
2010	46	M	3	2	2	1	0	2	0	0	0	3	2	1	16	7	0	1
2010	48	F	2	0	2	2	2	1	0	1	2	0	0	0	12	5	0	0
2010	42	F	0	0	0	0	0	0	0	0	1	0	0	0	1	7	0	0
2010	35	F	1	1	0	2	0	1	1	0	0	0	0	0	6	7	0	0
2010	26	M	0	0	0	0	0	0	0	0	0	0	0	0	0	6	0	0
2010	40	M	0	0	1	0	0	0	0	0	0	0	0	0	1	6	0	0
2010	61	M	0	0	0	0	0	0	0	0	0	0	0	0	0	6	0	0
2010	63	F	0	0	0	0	0	0	0	0	0	0	0	0	0	6	0	0
2010	58	M	0	0	0	0	0	0	0	0	0	0	1	0	1	7	0	0
2010	53	M	0	0	0	0	0	0	0	0	0	0	0	0	0	5	0	0
2010	54	F	3	2	3	3	2	2	0	2	0	1	2	0	20	6	0	0
2010	52	F	1	2	1	0	0	1	0	1	1	2	2	2	13	5	0	0
2010	50	F	2	2	2	2	1	2	2	0	0	1	2	0	16	7	0	0
2010	57	F	0	1	1	0	0	0	0	0	0	0	0	0	2	5	0	0
2010	67	M	1	0	0	0	0	0	0	0	1	1	1	0	4	7	0	0
2010	55	M	1	0	1	0	0	1	1	0	1	1	1	0	7	6	0	0
2010	48	F	1	1	1	0	1	1	0	0	0	0	1	0	6	8	0	0
2010	51	F	0	0	0	0	0	0	0	0	0	0	0	0	0	5	0	0
2010	57	F	1	1	1	0	1	1	1	1	0	0	2	0	9	6	0	0
2010	57	M	0	0	0	0	0	0	0	0	0	0	0	0	0	5	0	0
2010	56	F	0	0	0	0	0	0	0	0	0	0	0	0	0	6	0	0
2010	58	F	0	0	0	0	0	0	0	0	0	2	0	2	4	8	0	0
2010	47	F	0	0	0	0	0	0	0	0	0	0	0	0	0	7	0	0
2010	46	F	0	0	1	0	1	0	0	0	0	0	0	0	2	4	0	0
2010	62	M	0	0	0	0	0	1	0	1	0	0	0	0	2	8	0	0
2010	60	M	1	1	1	0	0	0	0	0	0	0	2	0	5	7	0	0
2010	67	F	1	2	2	0	0	0	2	0	0	0	2	1	10	7	0	0
2010	41	M	0	0	0	0	0	0	0	0	0	0	0	0	0	7	0	0
2010	54	M	1	0	0	0	0	1	0	0	0	0	1	0	3	7	0	1
2010	51	M	0	0	0	0	0	0	0	0	0	0	0	0	0	5	0	0
2010	59	M	0	0	0	0	0	0	0	0	0	0	0	0	0	7	0	0
2010	62	M	1	0	0	0	0	0	1	0	1	1	0	0	4	7	0	0
2010	51	M	0	2	1	0	0	0	0	3	1	0	0	0	7	7	0	0
2010	41	M	1	1	1	0	0	1	0	1	0	0	2	0	7	6	0	0
2010	50	M	0	1	0	0	0	0	0	1	1	0	3	0	6	7	0	0
2010	48	M	1	2	1	0	0	1	0	0	0	0	1	0	6	6	0	0
2010	63	M	3	2	1	0	0	2	2	0	0	3	2	0	15	5	1	0
2010	61	M	2	3	4	0	3	2	0	0	0	2	0	2	18	8	0	0
2010	33	M	2	0	1	1	0	0	0	0	0	2	0	0	6	6	0	0
2010	37	M	2	1	1	1	0	1	0	1	0	1	1	0	9	7	0	0
[truncated: 215,713+ more rows]
